# Supplementary material for: Distribution of Select Cement Proteins in the Acorn Barnacle Amphibalanus amphitrite
Source: Frontiers journal article supplement (doi:10.3389/fmars.2020.586281), 2020-10-06
Supplement: Data_Sheet_2.xlsx [file Data_Sheet_2.xlsx]

## Sheet: MS Samples
Sample	Database	Targeted	Mascot Job#	File Name	LC Method	MS1	MS2	Activation	Merged files
Middle Merged	Adhesive	Yes & No	3458	NA; params = +50 ppm; +1 Da (parent/fragment ion tolerances)	NA				M1-4; 5e5 HCD untargeted & 5e4 targeted -> 8 files
Middle 1 OTOT HCD 5e5	Adhesive	No	3374	C1_Middle1_metOTOT_5e5_HCD; +1 Da fragment	LONGwash_OTOT_5e5thresh_HCD	OT	OT	HCD
Middle 2 OTOT HCD 5e5	Adhesive	No	3375	C1_Middle2_metOTOT_5e5_HCD	LONGwash_OTOT_5e5thresh_HCD	OT	OT	HCD
Middle 3 OTOT HCD 5e5	Adhesive	No	3376	C1_Middle3_metOTOT_5e5_HCD	LONGwash_OTOT_5e5thresh_HCD	OT	OT	HCD
Middle 4 OTOT HCD 5e5	Adhesive	No	3377	C1_Middle4_metOTOT_5e5_HCD	LONGwash_OTOT_5e5thresh_HCD	OT	OT	HCD
Middle 1 OTOT HCD 5e4	Adhesive	Yes	3440	C1_M1_OTOT_targeted	LONGwash_OTOT_5e4thresh_HCD_19and43	OT	OT	HCD
Middle 2 OTOT HCD 5e4	Adhesive	Yes	3441	C1_M2_OTOT_targeted	LONGwash_OTOT_5e4thresh_HCD_19and43	OT	OT	HCD
Middle 3 OTOT HCD 5e4	Adhesive	Yes	3442	C1_M3_OTOT_targeted	LONGwash_OTOT_5e4thresh_HCD_19and43	OT	OT	HCD
Middle 4 OTOT HCD 5e4	Adhesive	Yes	3443	C1_M4_OTOT_targeted	LONGwash_OTOT_5e4thresh_HCD_19and43	OT	OT	HCD
Top Merged	Adhesive	Yes & No	3470	NA; params = +50 ppm; +1 Da (parent/fragment ion tolerances)	NA				T1-3; 5e5 HCD untargeted & 5e4 targeted -> 6 files
Top 1 OTOT HCD 5e5	Adhesive	No	3453	C1_T1_OTOT	LONGwash_OTOT_5e5thresh_HCD	OT	OT	HCD
Top 2 OTOT HCD 5e5	Adhesive	No	3455	C1_T2_OTOT	LONGwash_OTOT_5e5thresh_HCD	OT	OT	HCD
Top 3 OTOT HCD 5e5	Adhesive	No	3457	C1_T3_OTOT	LONGwash_OTOT_5e5thresh_HCD	OT	OT	HCD
Top 1 OTOT HCD 5e4	Adhesive	Yes	3454	C1_T1_OTOT_targeted	LONGwash_OTOT_5e4thresh_HCD_19and43	OT	OT	HCD
Top 2 OTOT HCD 5e4	Adhesive	Yes	3456	C1_T2_OTOT_targeted	LONGwash_OTOT_5e4thresh_HCD_19and43	OT	OT	HCD
Top 3 OTOT HCD 5e4	Adhesive	Yes	3469	C1_T3_OTOT_targeted_20191219172405	LONGwash_OTOT_5e4thresh_HCD_19and43	OT	OT	HCD
FFPE Merged	Adhesive	Yes & No	3605	NA; params = +50 ppm; +1 Da (parent/fragment ion tolerances)	NA				FFPE23 & 26 untargeted and targeted -> 4 files
FFPE23	Adhesive	No	11751	JS_UASM_FFPE23	LoadCol1_washCol2	OT	IT	HCD
FFPE26	Adhesive	No	11750	JS_UASM_FFPE26	LoadCol1_washCol2	OT	IT	HCD
FFPE23	Adhesive	Yes	3473	C1_FFPE23	LONGwash_OTOT_5e4thresh_HCD_19and43	OT	OT	HCD
FFPE26	Adhesive	Yes	3474	C1_FFPE26	LONGwash_OTOT_5e4thresh_HCD_19and43	OT	OT	HCD

## Sheet: AaCP19-1 Peptides
Sequence	Prob	Mascot Ion score	Mascot Identity score	Mascot Delta Ion Score	NTT	Modifications	Observed	Actual Mass	Charge	Delta Da	Delta PPM	Retention Time	Intensity	TIC	Start	Stop	# Other Proteins	Other Proteins	Spectrum ID
(K)AAVGNTGVTGAGATAGDGILKnLVK(G)	0.98	25.91	25	8.28	2	Deamidated (+1)	564.811	2255.22	4	0.003282	1.455	2035.8		4016720	77	101	0		C1_M2_OTOT_targeted.5137.5137.4 File:"C1_M2_OTOT_targeted.raw", NativeID:"controllerType=0 controllerNumber=1 scan=5137"
(K)IKEKKQGTATSSSGHK(G)	0.95	34.81	25	33.55	2		562.992	1685.96	3	0.04883	28.95	3191.65		3236930	161	176	0		C1_M3_OTOT_targeted.8631.8631.3 File:"C1_M3_OTOT_targeted.raw", NativeID:"controllerType=0 controllerNumber=1 scan=8631"
(K)KQGTATSSSGHK(G)	0.98	23.86	25	18.6	2		594.804	1187.59	2	0.003544	2.982	2216.05		5335160	165	176	0		C1_M2_OTOT_targeted.5690.5690.2 File:"C1_M2_OTOT_targeted.raw", NativeID:"controllerType=0 controllerNumber=1 scan=5690"
(K)VGqAAVTKGGAAVSTTGSSGGTGTVHCVVVGPnK(I)	1	40.58	25	34.88	2	Deamidated (+1), Deamidated (+1)	764.895	3055.55	4	0.02554	8.355	4092.7		252865	39	72	0		JS_UASM_FFPE26.78374.78374.4 File:"JS_UASM_FFPE26.raw", NativeID:"controllerType=0 controllerNumber=1 scan=78374"
(K)AAVGNTGVTGAGATAGDGILK(N)	0.97	20.98	25	15.75	2		600.986	1799.94	3	-0.001646	-0.9139	2516.1		327901	77	97	0		JS_UASM_FFPE23.44147.44147.3 File:"JS_UASM_FFPE23.raw", NativeID:"controllerType=0 controllerNumber=1 scan=44147"
(K)EKKQGTATSSSGHK(G)	0.98	18.13	25	10.38	2		723.368	1444.72	2	-0.005882	-4.068	3499.76		1953370	163	176	0		C1_FFPE26.8985.8985.2 File:"C1_FFPE26.raw", NativeID:"controllerType=0 controllerNumber=1 scan=8985"
(K)KqGTATSSSGHKGSGVGDSLLKVVNEAETELK(L)	0.99	25.43	25	3.69	2	Deamidated (+1)	804.664	3214.63	4	-0.003962	-1.232	6519.52		26684.2	165	196	0		JS_UASM_FFPE23.135230.135230.4 File:"JS_UASM_FFPE23.raw", NativeID:"controllerType=0 controllerNumber=1 scan=135230"

## Sheet: AaCP43-1 Peptides
Sequence	Prob	Mascot Ion score	Mascot Identity score	Mascot Delta Ion Score	NTT	Modifications	Observed	Actual Mass	Charge	Delta Da	Delta PPM	Retention Time	RT Minutes	TIC	Start	Stop	# Other Proteins	Other Proteins	Spectrum ID
(R)AGATEGSAASTSATKVKcKPGFSK(G)	0.97	21.69	25	14	2	Carbamidomethyl (+57)	781.067	2340.18	3	0.003404	1.454	4122.95		2933730	117	140	0		C1_M4_OTOT_targeted.11059.11059.3 File:"C1_M4_OTOT_targeted.raw", NativeID:"controllerType=0 controllerNumber=1 scan=11059"
(R)AGATEGSAASTSATKVKcKPGFSK(G)	0.95	23.69	25	14.99	2	Carbamidomethyl (+57)	781.069	2340.18	3	0.009815	4.192	4100.48	68.3413	5491310	117	140	0		C1_Middle2_metOTOT_5e5_HCD.11508.11508.3 File:"C1_Middle2_metOTOT_5e5_HCD.raw", NativeID:"controllerType=0 controllerNumber=1 scan=11508"
(R)KRGALGAETSAQTTGSSATVGGGSDSK(G)	0.99	29.28	25	15.41	2		621.063	2480.22	4	0.01203	4.85	3625.35	60.4225	2774400	279	305	0		C1_M1_OTOT_targeted.10007.10007.4 File:"C1_M1_OTOT_targeted.raw", NativeID:"controllerType=0 controllerNumber=1 scan=10007"
(R)KRGALGAETSAQTTGSSATVGGGSDSK(G)	0.98	26.26	25	17	2		621.063	2480.22	4	0.01155	4.653	3730.74		1017610	279	305	0		C1_M4_OTOT_targeted.9869.9869.4 File:"C1_M4_OTOT_targeted.raw", NativeID:"controllerType=0 controllerNumber=1 scan=9869"
(R)KRGALGAETSAQTTGSSATVGGGSDSK(G)	0.95	27.62	25	17.43	2		621.072	2480.26	4	0.0467	18.82	3366.91		3538920	279	305	0		C1_M2_OTOT_targeted.9319.9319.4 File:"C1_M2_OTOT_targeted.raw", NativeID:"controllerType=0 controllerNumber=1 scan=9319"
(R)KRGALGAETSAQTTGSSATVGGGSDSK(G)	0.99	30.27	25	24.74	2		621.064	2480.23	4	0.01716	6.917	3531.34	58.8557	2745250	279	305	0		C1_T3_OTOT_targeted_20191219172405.9366.9366.4 File:"C1_T3_OTOT_targeted_20191219172405.raw", NativeID:"controllerType=0 controllerNumber=1 scan=9366"
(R)QTGAVEGSQTSSASGSVTLKRPVWPcRLPSK(A)	0.95	20.58	25	10.41	2	Carbamidomethyl (+57)	655.147	3270.7	5	0.02126	6.5	4150.52	69.1753	3061970	406	436	0		C1_T1_OTOT_targeted.11593.11593.5 File:"C1_T1_OTOT_targeted.raw", NativeID:"controllerType=0 controllerNumber=1 scan=11593"
(R)QTGAVEGSQTSSASGSVTLKRPVWPcRLPSK(A)	0.95	20.26	25	10.68	2	Carbamidomethyl (+57)	655.147	3270.7	5	0.02248	6.872	4198.54		2633550	406	436	0		C1_T1_OTOT_targeted.11735.11735.5 File:"C1_T1_OTOT_targeted.raw", NativeID:"controllerType=0 controllerNumber=1 scan=11735"
(R)NPRDnAELLR(I)	0.97	24.87	25	1.96	2	Deamidated (+1)	599.811	1197.61	2	-0.0035	-2.92	2040.36	34.006	4046460	535	544	0		C1_T1_OTOT.5361.5361.2 File:"C1_T1_OTOT.raw", NativeID:"controllerType=0 controllerNumber=1 scan=5361"
(R)AATDADAVTVGTLK(T)	1	41.66	25	40.99	2		666.854	1331.69	2	-1.394e-05	-0.01046	2433.36		2460840	67	80	0		C1_AO_OTOT.5855.5855.2 File:"C1_AO_OTOT.raw", NativeID:"controllerType=0 controllerNumber=1 scan=5855"
(R)AATDADAVTVGTLK(T)	1	38.79	25	34.18	2		666.854	1331.69	2	-0.0002579	-0.1935	2448.84		2171250	67	80	0		C1_AO_OTOT.5896.5896.2 File:"C1_AO_OTOT.raw", NativeID:"controllerType=0 controllerNumber=1 scan=5896"
(R)AATDADAVTVGTLK(T)	1	37.73	25	32.9	2		666.856	1331.7	2	0.00377	2.829	2479.51		1681640	67	80	0		C1_AO_OTOT.5981.5981.2 File:"C1_AO_OTOT.raw", NativeID:"controllerType=0 controllerNumber=1 scan=5981"
(R)AATDADAVTVGTLK(T)	1	35.57	25	32.36	2		666.853	1331.69	2	-0.001602	-1.202	2464.27		2006540	67	80	0		C1_AO_OTOT.5938.5938.2 File:"C1_AO_OTOT.raw", NativeID:"controllerType=0 controllerNumber=1 scan=5938"
(R)AATDADAVTVGTLK(T)	1	34.46	25	32.42	2		666.854	1331.69	2	-0.0001359	-0.102	2418		2717590	67	80	0		C1_AO_OTOT.5811.5811.2 File:"C1_AO_OTOT.raw", NativeID:"controllerType=0 controllerNumber=1 scan=5811"
(R)AATDADAVTVGTLK(T)	1	28.68	25	27.96	2		666.855	1331.7	2	0.001938	1.454	2496.07		1397490	67	80	0		C1_AO_OTOT.6027.6027.2 File:"C1_AO_OTOT.raw", NativeID:"controllerType=0 controllerNumber=1 scan=6027"
(R)AATDADAVTVGTLK(T)	1	26.58	25	22.92	2		666.853	1331.69	2	-0.00148	-1.11	2402.7		1567780	67	80	0		C1_AO_OTOT.5767.5767.2 File:"C1_AO_OTOT.raw", NativeID:"controllerType=0 controllerNumber=1 scan=5767"
(R)AATDADAVTVGTLK(T)	1	21.19	25	10.96	2		666.854	1331.69	2	-0.0008679	-0.6513	2298.37		961210	67	80	0		C1_AO_OTOT.5468.5468.2 File:"C1_AO_OTOT.raw", NativeID:"controllerType=0 controllerNumber=1 scan=5468"
(R)AATDADAVTVGTLKTAGTAIGK(S)	1	29.68	25	20.34	2		678.035	2031.08	3	-0.001347	-0.6628	3120.31		1878500	67	88	0		C1_AO_OTOT.7716.7716.3 File:"C1_AO_OTOT.raw", NativeID:"controllerType=0 controllerNumber=1 scan=7716"
(K)TAGTAIGKSSGGAVSLEQTADQGSK(A)	1	42.06	25	26.65	2		774.39	2320.15	3	-0.00257	-1.107	2223.93		805173	81	105	0		C1_AO_OTOT.5227.5227.3 File:"C1_AO_OTOT.raw", NativeID:"controllerType=0 controllerNumber=1 scan=5227"
(K)TAGTAIGKSSGGAVSLEQTADQGSK(A)	1	36.21	25	30.15	2		774.391	2320.15	3	-0.0003739	-0.1611	2241.07		838978	81	105	0		C1_AO_OTOT.5281.5281.3 File:"C1_AO_OTOT.raw", NativeID:"controllerType=0 controllerNumber=1 scan=5281"
(K)TAGTAIGKSSGGAVSLEQTADqGSK(A)	1	30.94	25	1.81	2	Deamidated (+1)	774.725	2321.15	3	0.01738	7.484	2212.71		657982	81	105	0		C1_AO_OTOT.5191.5191.3 File:"C1_AO_OTOT.raw", NativeID:"controllerType=0 controllerNumber=1 scan=5191"
(K)AGVKVDLYSQR(A)	0.99	23.15	25	15.01	2		412.563	1234.67	3	-0.001122	-0.908	2073.32		1476180	106	116	0		C1_AO_OTOT.4749.4749.3 File:"C1_AO_OTOT.raw", NativeID:"controllerType=0 controllerNumber=1 scan=4749"
(R)GALGAETSAQTTGSSATVGGGSDSKGESSAGGTANQGSNVAAESDSNQKIR(S)	1	109.16	25	100.91	2		1179.04	4712.15	4	-0.01415	-3.002	2263.43		2273870	281	331	0		C1_AO_OTOT.5354.5354.4 File:"C1_AO_OTOT.raw", NativeID:"controllerType=0 controllerNumber=1 scan=5354"
(R)GALGAETSAQTTGSSATVGGGSDSKGESSAGGTANQGSNVAAESDSNQKIR(S)	1	103.59	25	90.63	2		1179.05	4712.16	4	-0.002922	-0.62	2236.82		1903730	281	331	0		C1_AO_OTOT.5267.5267.4 File:"C1_AO_OTOT.raw", NativeID:"controllerType=0 controllerNumber=1 scan=5267"
(R)GALGAETSAQTTGSSATVGGGSDSKGESSAGGTANQGSNVAAESDSNqKIR(S)	1	102.61	25	0	2	Deamidated (+1)	1179.3	4713.17	4	0.02039	4.324	2217.76		1166890	281	331	0		C1_AO_OTOT.5208.5208.4 File:"C1_AO_OTOT.raw", NativeID:"controllerType=0 controllerNumber=1 scan=5208"
(R)GALGAETSAQTTGSSATVGGGSDSKGESSAGGTANQGSNVAAESDSnQKIR(S)	1	101.93	25	0	2	Deamidated (+1)	1179.3	4713.16	4	0.01697	3.6	2239.18		1890460	281	331	0		C1_AO_OTOT.5274.5274.4 File:"C1_AO_OTOT.raw", NativeID:"controllerType=0 controllerNumber=1 scan=5274"
(R)GALGAETSAQTTGSSATVGGGSDSKGESSAGGTANQGSNVAAESDSNqKIR(S)	1	99.12	25	0	2	Deamidated (+1)	1179.3	4713.16	4	0.01404	2.978	2305.12		1897630	281	331	0		C1_AO_OTOT.5489.5489.4 File:"C1_AO_OTOT.raw", NativeID:"controllerType=0 controllerNumber=1 scan=5489"
(R)GALGAETSAQTTGSSATVGGGSDSKGESSAGGTANQGSNVAAESDSNqKIR(S)	1	97.84	25	0	2	Deamidated (+1)	1179.3	4713.17	4	0.02087	4.428	2273.1		2081330	281	331	0		C1_AO_OTOT.5385.5385.4 File:"C1_AO_OTOT.raw", NativeID:"controllerType=0 controllerNumber=1 scan=5385"
(R)GALGAETSAQTTGSSATVGGGSDSKGESSAGGTANQGSNVAAESDSNqKIR(S)	1	95.9	25	0	2	Deamidated (+1)	1179.3	4713.15	4	0.007694	1.632	2288.64		2184490	281	331	0		C1_AO_OTOT.5436.5436.4 File:"C1_AO_OTOT.raw", NativeID:"controllerType=0 controllerNumber=1 scan=5436"
(R)GALGAETSAQTTGSSATVGGGSDSKGESSAGGTANQGSNVAAESDSNQKIR(S)	1	92.32	25	84.4	2		1179.04	4712.15	4	-0.01366	-2.899	2281.06		2225150	281	331	0		C1_AO_OTOT.5412.5412.4 File:"C1_AO_OTOT.raw", NativeID:"controllerType=0 controllerNumber=1 scan=5412"
(R)GALGAETSAQTTGSSATVGGGSDSKGESSAGGTANQGSNVAAESDSnQKIR(S)	1	81.67	25	0	2	Deamidated (+1)	1179.3	4713.16	4	0.01551	3.289	2256.26		2115020	281	331	0		C1_AO_OTOT.5331.5331.4 File:"C1_AO_OTOT.raw", NativeID:"controllerType=0 controllerNumber=1 scan=5331"
(R)GALGAETSAqTTGSSATVGGGSDSKGESSAGGTAnQGSNVAAESDSNqKIR(S)	1	78.35	25	3.12	2	Deamidated (+1), Deamidated (+1), Deamidated (+1)	944.038	4715.16	5	0.04056	8.601	2254.01		438920	281	331	0		C1_AO_OTOT.5324.5324.5 File:"C1_AO_OTOT.raw", NativeID:"controllerType=0 controllerNumber=1 scan=5324"
(R)GALGAETSAQTTGSSATVGGGSDSKGESSAGGTANQGSnVAAESDSNqKIRSTR(T)	1	74.55	25	0	2	Deamidated (+1), Deamidated (+1)	1012.68	5058.36	5	0.04782	9.451	2149.47		599441	281	334	0		C1_AO_OTOT.4982.4982.5 File:"C1_AO_OTOT.raw", NativeID:"controllerType=0 controllerNumber=1 scan=4982"
(K)RAATDADAVTVGTLK(T)	1	44.54	25	39.57	2		744.904	1487.79	2	-0.0005279	-0.3546	2100.21		450027	66	80	0		C1_AO_OTOT_targeted.4820.4820.2 File:"C1_AO_OTOT_targeted.raw", NativeID:"controllerType=0 controllerNumber=1 scan=4820"
(K)RAATDADAVTVGTLK(T)	1	42.91	25	28.53	2		744.905	1487.8	2	0.0009361	0.6287	2115.98		897384	66	80	0		C1_AO_OTOT_targeted.4867.4867.2 File:"C1_AO_OTOT_targeted.raw", NativeID:"controllerType=0 controllerNumber=1 scan=4867"
(K)RAATDADAVTVGTLK(T)	1	31.82	25	28.47	2		496.94	1487.8	3	0.00251	1.686	2087.39		750073	66	80	0		C1_AO_OTOT_targeted.4786.4786.3 File:"C1_AO_OTOT_targeted.raw", NativeID:"controllerType=0 controllerNumber=1 scan=4786"
(K)RAATDADAVTVGTLK(T)	0.95	22.19	25	21.48	2		496.939	1487.8	3	0.001505	1.011	2103.62		830597	66	80	0		C1_AO_OTOT_targeted.4831.4831.3 File:"C1_AO_OTOT_targeted.raw", NativeID:"controllerType=0 controllerNumber=1 scan=4831"
(K)RAATDADAVTVGTLK(T)	0.95	22.17	25	13.23	2		496.939	1487.79	3	-0.0006939	-0.4661	2154.23		747211	66	80	0		C1_AO_OTOT_targeted.4972.4972.3 File:"C1_AO_OTOT_targeted.raw", NativeID:"controllerType=0 controllerNumber=1 scan=4972"
(K)SSGGAVSLEQTADQGSK(A)	0.99	30.2	25	16.17	2		811.387	1620.76	2	-0.0002619	-0.1615	1948.97		688618	89	105	0		C1_AO_OTOT_targeted.4432.4432.2 File:"C1_AO_OTOT_targeted.raw", NativeID:"controllerType=0 controllerNumber=1 scan=4432"
(K)SSGGAVSLEQTADQGSK(A)	0.99	30.11	25	16.2	2		811.389	1620.76	2	0.005108	3.15	1995.5		612673	89	105	0		C1_AO_OTOT_targeted.4550.4550.2 File:"C1_AO_OTOT_targeted.raw", NativeID:"controllerType=0 controllerNumber=1 scan=4550"
(K)SSGGAVSLEQTADQGSK(A)	0.99	28.89	25	17.78	2		811.387	1620.76	2	0.0002261	0.1394	1964.35		853092	89	105	0		C1_AO_OTOT_targeted.4471.4471.2 File:"C1_AO_OTOT_targeted.raw", NativeID:"controllerType=0 controllerNumber=1 scan=4471"
(K)SSGGAVSLEQTADQGSK(A)	0.97	24.72	25	14.45	2		811.386	1620.76	2	-0.00246	-1.517	2011.15		473143	89	105	0		C1_AO_OTOT_targeted.4591.4591.2 File:"C1_AO_OTOT_targeted.raw", NativeID:"controllerType=0 controllerNumber=1 scan=4591"
(K)TDFNTGGSAGHSAGEGSGFAETSVGGQTR(Q)	1	86.4	25	80.32	2		914.74	2741.2	3	0.006572	2.397	2546.12		953877	377	405	0		C1_AO_OTOT_targeted.6050.6050.3 File:"C1_AO_OTOT_targeted.raw", NativeID:"controllerType=0 controllerNumber=1 scan=6050"
(K)TDFNTGGSAGHSAGEGSGFAETSVGGQTR(Q)	1	77.88	25	70.91	2		914.749	2741.22	3	0.03276	11.95	2493.51		826493	377	405	0		C1_AO_OTOT_targeted.5908.5908.3 File:"C1_AO_OTOT_targeted.raw", NativeID:"controllerType=0 controllerNumber=1 scan=5908"
(K)TDFNTGGSAGHSAGEGSGFAETSVGGQTR(Q)	1	73.67	25	68.26	2		914.74	2741.2	3	0.008222	2.998	2429.29		992882	377	405	0		C1_AO_OTOT_targeted.5735.5735.3 File:"C1_AO_OTOT_targeted.raw", NativeID:"controllerType=0 controllerNumber=1 scan=5735"
(K)TDFNTGGSAGHSAGEGSGFAETSVGGQTR(Q)	1	75.32	25	64.57	2		914.754	2741.24	3	0.04795	17.49	2476.97		914526	377	405	0		C1_AO_OTOT_targeted.5864.5864.3 File:"C1_AO_OTOT_targeted.raw", NativeID:"controllerType=0 controllerNumber=1 scan=5864"
(K)TDFNTGGSAGHSAGEGSGFAETSVGGQTR(Q)	1	67.02	25	62.08	2		914.739	2741.19	3	0.002177	0.7939	2450.19		1055650	377	405	0		C1_AO_OTOT_targeted.5791.5791.3 File:"C1_AO_OTOT_targeted.raw", NativeID:"controllerType=0 controllerNumber=1 scan=5791"
(K)TDFNTGGSAGHSAGEGSGFAETSVGGQTR(Q)	1	59.48	25	53.74	2		914.745	2741.21	3	0.02012	7.338	2598.76		540120	377	405	0		C1_AO_OTOT_targeted.6190.6190.3 File:"C1_AO_OTOT_targeted.raw", NativeID:"controllerType=0 controllerNumber=1 scan=6190"
(K)TDFNTGGSAGHSAGEGSGFAETSVGGQTR(Q)	1	52.22	25	37.76	2		914.736	2741.19	3	-0.004231	-1.543	2411.64		591508	377	405	0		C1_AO_OTOT_targeted.5691.5691.3 File:"C1_AO_OTOT_targeted.raw", NativeID:"controllerType=0 controllerNumber=1 scan=5691"
(K)TDFNTGGSAGHSAGEGSGFAETSVGGQTR(Q)	1	45.5	25	26.47	2		914.74	2741.2	3	0.006938	2.53	2395.68		355076	377	405	0		C1_AO_OTOT_targeted.5649.5649.3 File:"C1_AO_OTOT_targeted.raw", NativeID:"controllerType=0 controllerNumber=1 scan=5649"
(K)RAATDADAVTVGTLK(T)	1	30.81	25	29.83	2		744.911	1487.81	2	0.01278	8.583	2070.37		996929	66	80	0		C1_FFPE23.4893.4893.2 File:"C1_FFPE23.raw", NativeID:"controllerType=0 controllerNumber=1 scan=4893"
(K)RAATDADAVTVGTLK(T)	1	47.3	25	41.98	2		744.903	1487.79	2	-0.003946	-2.65	2085.69		1270820	66	80	0		C1_FFPE23.4939.4939.2 File:"C1_FFPE23.raw", NativeID:"controllerType=0 controllerNumber=1 scan=4939"
(K)RAATDADAVTVGTLK(T)	0.99	27.94	25	15.84	2		496.939	1487.8	3	0.001688	1.134	2089.19		2622840	66	80	0		C1_FFPE23.4950.4950.3 File:"C1_FFPE23.raw", NativeID:"controllerType=0 controllerNumber=1 scan=4950"
(K)RAATDADAVTVGTLK(T)	1	30.13	25	21.25	2		496.939	1487.79	3	-0.0005109	-0.3432	2107.02		2442320	66	80	0		C1_FFPE23.5003.5003.3 File:"C1_FFPE23.raw", NativeID:"controllerType=0 controllerNumber=1 scan=5003"
(K)RAATDADAVTVGTLK(T)	0.95	26.57	25	18.84	2		496.931	1487.77	3	-0.02367	-15.9	2141.03		2155140	66	80	0		C1_FFPE23.5098.5098.3 File:"C1_FFPE23.raw", NativeID:"controllerType=0 controllerNumber=1 scan=5098"
(K)SSGGAVSLEQTADQGSK(A)	0.98	17.81	25	10.5	2		811.385	1620.75	2	-0.004534	-2.796	1806.71		503137	89	105	0		C1_FFPE23.4118.4118.2 File:"C1_FFPE23.raw", NativeID:"controllerType=0 controllerNumber=1 scan=4118"
(K)SSGGAVSLEQTADQGSK(A)	0.98	17.89	25	5.15	2		811.385	1620.75	2	-0.004656	-2.871	1851.51		381499	89	105	0		C1_FFPE23.4250.4250.2 File:"C1_FFPE23.raw", NativeID:"controllerType=0 controllerNumber=1 scan=4250"
(K)SSGGAVSLEQTADQGSK(A)	0.97	16.86	25	11.72	2		811.384	1620.75	2	-0.005146	-3.173	1924.61		493356	89	105	0		C1_FFPE23.4463.4463.2 File:"C1_FFPE23.raw", NativeID:"controllerType=0 controllerNumber=1 scan=4463"
(K)SSGGAVSLEQTADQGSK(A)	1	39.99	25	34.1	2		811.393	1620.77	2	0.01219	7.515	1940.08		2181380	89	105	0		C1_FFPE23.4508.4508.2 File:"C1_FFPE23.raw", NativeID:"controllerType=0 controllerNumber=1 scan=4508"
(K)SSGGAVSLEQTADQGSK(A)	1	39.55	25	34.47	2		811.392	1620.77	2	0.01011	6.236	1955.77		4234370	89	105	0		C1_FFPE23.4556.4556.2 File:"C1_FFPE23.raw", NativeID:"controllerType=0 controllerNumber=1 scan=4556"
(K)SSGGAVSLEQTADQGSK(A)	1	41.5	25	39.97	2		811.388	1620.76	2	0.001324	0.8164	1971.77		4100490	89	105	0		C1_FFPE23.4602.4602.2 File:"C1_FFPE23.raw", NativeID:"controllerType=0 controllerNumber=1 scan=4602"
(K)SSGGAVSLEQTADQGSK(A)	1	33.37	25	30.74	2		811.388	1620.76	2	0.002424	1.495	1987.24		3453390	89	105	0		C1_FFPE23.4647.4647.2 File:"C1_FFPE23.raw", NativeID:"controllerType=0 controllerNumber=1 scan=4647"
(K)SSGGAVSLEQTADQGSK(A)	1	42.56	25	34.24	2		811.395	1620.77	2	0.01561	9.623	2002.73		2197000	89	105	0		C1_FFPE23.4695.4695.2 File:"C1_FFPE23.raw", NativeID:"controllerType=0 controllerNumber=1 scan=4695"
(K)SSGGAVSLEQTADQGSK(A)	1	41.56	25	36.44	2		811.388	1620.76	2	0.002668	1.645	2018.01	33.6335	1663940	89	105	0		C1_FFPE23.4736.4736.2 File:"C1_FFPE23.raw", NativeID:"controllerType=0 controllerNumber=1 scan=4736"
(K)SSGGAVSLEQTADQGSK(A)	1	41.44	25	29.54	2		811.392	1620.77	2	0.009626	5.936	2033.39	33.8898	1216450	89	105	0		C1_FFPE23.4781.4781.2 File:"C1_FFPE23.raw", NativeID:"controllerType=0 controllerNumber=1 scan=4781"
(K)SGSAAALGAIKDK(L)	1	25.45	25	9.57	2		594.832	1187.65	2	-0.002514	-2.115	1689.44	28.1573	863340	344	356	0		C1_FFPE23.3804.3804.2 File:"C1_FFPE23.raw", NativeID:"controllerType=0 controllerNumber=1 scan=3804"
(K)TDFNTGGSAGHSAGEGSGFAETSVGGQTR(Q)	1	57.88	25	41.06	2		914.74	2741.2	3	0.005291	1.929	2377.87		632248	377	405	0		C1_FFPE23.5776.5776.3 File:"C1_FFPE23.raw", NativeID:"controllerType=0 controllerNumber=1 scan=5776"
(K)TDFNTGGSAGHSAGEGSGFAETSVGGQTR(Q)	1	69.89	25	61.35	2		914.741	2741.2	3	0.008588	3.132	2401.76		1665500	377	405	0		C1_FFPE23.5845.5845.3 File:"C1_FFPE23.raw", NativeID:"controllerType=0 controllerNumber=1 scan=5845"
(K)TDFNTGGSAGHSAGEGSGFAETSVGGQTR(Q)	1	78.06	25	71.17	2		914.74	2741.2	3	0.00584	2.13	2421.28		3197280	377	405	0		C1_FFPE23.5905.5905.3 File:"C1_FFPE23.raw", NativeID:"controllerType=0 controllerNumber=1 scan=5905"
(K)TDFNTGGSAGHSAGEGSGFAETSVGGQTR(Q)	1	79.91	25	79.32	2		1371.61	2741.21	2	0.02337	8.522	2433.94		450014	377	405	0		C1_FFPE23.5945.5945.2 File:"C1_FFPE23.raw", NativeID:"controllerType=0 controllerNumber=1 scan=5945"
(K)TDFNTGGSAGHSAGEGSGFAETSVGGQTR(Q)	1	79.15	25	71.75	2		914.742	2741.2	3	0.01152	4.2	2454.7		3050550	377	405	0		C1_FFPE23.6002.6002.3 File:"C1_FFPE23.raw", NativeID:"controllerType=0 controllerNumber=1 scan=6002"
(K)TDFNTGGSAGHSAGEGSGFAETSVGGQTR(Q)	1	60.35	25	51.38	2		914.742	2741.2	3	0.0128	4.667	2470.04		2652440	377	405	0		C1_FFPE23.6048.6048.3 File:"C1_FFPE23.raw", NativeID:"controllerType=0 controllerNumber=1 scan=6048"
(K)TDFNTGGSAGHSAGEGSGFAETSVGGQTR(Q)	1	96.14	25	84.07	2		914.749	2741.23	3	0.03477	12.68	2486.75	41.4458	2369400	377	405	0		C1_FFPE23.6099.6099.3 File:"C1_FFPE23.raw", NativeID:"controllerType=0 controllerNumber=1 scan=6099"
(K)TDFNTGGSAGHSAGEGSGFAETSVGGQTR(Q)	1	57.2	25	48.22	2		914.743	2741.21	3	0.01555	5.669	2599.36		1082450	377	405	0		C1_FFPE23.6425.6425.3 File:"C1_FFPE23.raw", NativeID:"controllerType=0 controllerNumber=1 scan=6425"
(K)TDFNTGGSAGHSAGEGSGFAETSVGGQTR(Q)	1	61.54	25	50.43	2		914.757	2741.25	3	0.05766	21.03	2622.35		905005	377	405	0		C1_FFPE23.6496.6496.3 File:"C1_FFPE23.raw", NativeID:"controllerType=0 controllerNumber=1 scan=6496"
(K)TDFNTGGSAGHSAGEGSGFAETSVGGQTR(Q)	1	44	25	38.23	2		914.74	2741.2	3	0.00584	2.13	2642.02		788058	377	405	0		C1_FFPE23.6554.6554.3 File:"C1_FFPE23.raw", NativeID:"controllerType=0 controllerNumber=1 scan=6554"
(K)RAATDADAVTVGTLK(T)	0.96	21.31	25	17.81	2		496.939	1487.8	3	0.001229	0.8255	2098.97		1242900	66	80	0		C1_FFPE26.4936.4936.3 File:"C1_FFPE26.raw", NativeID:"controllerType=0 controllerNumber=1 scan=4936"
(K)RAATDADAVTVGTLK(T)	0.96	19.95	25	15.61	2		496.938	1487.79	3	-0.001243	-0.8349	2119.99		1087500	66	80	0		C1_FFPE26.4994.4994.3 File:"C1_FFPE26.raw", NativeID:"controllerType=0 controllerNumber=1 scan=4994"
(K)RAATDADAVTVGTLK(T)	0.97	23.39	25	20.44	2		744.908	1487.8	2	0.006064	4.073	2076.04		952922	66	80	0		C1_FFPE26.4868.4868.2 File:"C1_FFPE26.raw", NativeID:"controllerType=0 controllerNumber=1 scan=4868"
(K)SSGGAVSLEQTADQGSK(A)	0.97	17.24	25	9.94	2		811.385	1620.75	2	-0.004656	-2.871	1830.45		417496	89	105	0		C1_FFPE26.4165.4165.2 File:"C1_FFPE26.raw", NativeID:"controllerType=0 controllerNumber=1 scan=4165"
(K)SSGGAVSLEQTADQGSK(A)	1	35.57	25	29.67	2		811.387	1620.76	2	-0.0001399	-0.08629	1943.67		1666950	89	105	0		C1_FFPE26.4482.4482.2 File:"C1_FFPE26.raw", NativeID:"controllerType=0 controllerNumber=1 scan=4482"
(K)SSGGAVSLEQTADQGSK(A)	1	55.37	25	34.19	2		811.388	1620.76	2	0.002302	1.419	1959.42	32.657	2305630	89	105	0		C1_FFPE26.4530.4530.2 File:"C1_FFPE26.raw", NativeID:"controllerType=0 controllerNumber=1 scan=4530"
(K)SSGGAVSLEQTADQGSK(A)	1	37	25	31.08	2		811.388	1620.76	2	0.001934	1.193	1974.83		2037500	89	105	0		C1_FFPE26.4575.4575.2 File:"C1_FFPE26.raw", NativeID:"controllerType=0 controllerNumber=1 scan=4575"
(K)SSGGAVSLEQTADQGSK(A)	1	28.85	25	6.43	2		811.389	1620.76	2	0.005108	3.15	1990.09		1616630	89	105	0		C1_FFPE26.4620.4620.2 File:"C1_FFPE26.raw", NativeID:"controllerType=0 controllerNumber=1 scan=4620"
(K)SSGGAVSLEQTADQGSK(A)	0.98	26.36	25	18.31	2		811.398	1620.78	2	0.02183	13.46	2005.63		1239960	89	105	0		C1_FFPE26.4663.4663.2 File:"C1_FFPE26.raw", NativeID:"controllerType=0 controllerNumber=1 scan=4663"
(K)SSGGAVSLEQTADQGSK(A)	0.98	24.98	25	12.44	2		811.397	1620.78	2	0.02061	12.71	2021.19		930049	89	105	0		C1_FFPE26.4709.4709.2 File:"C1_FFPE26.raw", NativeID:"controllerType=0 controllerNumber=1 scan=4709"
(K)SSGGAVSLEQTADQGSK(A)	0.97	19.32	25	14.95	2		811.386	1620.76	2	-0.00185	-1.141	2086.02		395687	89	105	0		C1_FFPE26.4899.4899.2 File:"C1_FFPE26.raw", NativeID:"controllerType=0 controllerNumber=1 scan=4899"
(K)TDFNTGGSAGHSAGEGSGFAETSVGGQTR(Q)	0.99	22.14	25	15.5	2		914.735	2741.18	3	-0.007711	-2.812	2387.12		433703	377	405	0		C1_FFPE26.5728.5728.3 File:"C1_FFPE26.raw", NativeID:"controllerType=0 controllerNumber=1 scan=5728"
(K)TDFNTGGSAGHSAGEGSGFAETSVGGQTR(Q)	1	69.29	25	61.3	2		914.74	2741.2	3	0.007853	2.864	2410.4		684653	377	405	0		C1_FFPE26.5794.5794.3 File:"C1_FFPE26.raw", NativeID:"controllerType=0 controllerNumber=1 scan=5794"
(K)TDFNTGGSAGHSAGEGSGFAETSVGGQTR(Q)	1	64.77	25	55.11	2		914.743	2741.21	3	0.01628	5.936	2426.78		1016340	377	405	0		C1_FFPE26.5841.5841.3 File:"C1_FFPE26.raw", NativeID:"controllerType=0 controllerNumber=1 scan=5841"
(K)TDFNTGGSAGHSAGEGSGFAETSVGGQTR(Q)	1	84.37	25	71.87	2		914.739	2741.2	3	0.004193	1.529	2445.94		1162910	377	405	0		C1_FFPE26.5895.5895.3 File:"C1_FFPE26.raw", NativeID:"controllerType=0 controllerNumber=1 scan=5895"
(K)TDFNTGGSAGHSAGEGSGFAETSVGGQTR(Q)	1	73.77	25	65.51	2		914.746	2741.22	3	0.0236	8.607	2465.21		1104020	377	405	0		C1_FFPE26.5949.5949.3 File:"C1_FFPE26.raw", NativeID:"controllerType=0 controllerNumber=1 scan=5949"
(K)TDFNTGGSAGHSAGEGSGFAETSVGGQTR(Q)	1	75.83	25	64.91	2		914.74	2741.2	3	0.00584	2.13	2491.36		1034540	377	405	0		C1_FFPE26.6021.6021.3 File:"C1_FFPE26.raw", NativeID:"controllerType=0 controllerNumber=1 scan=6021"
(K)TDFNTGGSAGHSAGEGSGFAETSVGGQTR(Q)	1	82.13	25	72.87	2		914.742	2741.21	3	0.0139	5.068	2584.99		837528	377	405	0		C1_FFPE26.6282.6282.3 File:"C1_FFPE26.raw", NativeID:"controllerType=0 controllerNumber=1 scan=6282"
(K)TDFNTGGSAGHSAGEGSGFAETSVGGQTR(Q)	1	42.78	25	34.03	2		914.745	2741.21	3	0.02305	8.406	2629.91		614497	377	405	0		C1_FFPE26.6405.6405.3 File:"C1_FFPE26.raw", NativeID:"controllerType=0 controllerNumber=1 scan=6405"
(K)RAATDADAVTVGTLK(T)	1	58.34	25	50.3	2		744.903	1487.79	2	-0.003214	-2.159	1556.15		162931	66	80	0		JS_UASM_FFPE23.19784.19784.2 File:"JS_UASM_FFPE23.raw", NativeID:"controllerType=0 controllerNumber=1 scan=19784"
(K)RAATDADAVTVGTLK(T)	1	34.15	25	19.22	2		496.937	1487.79	3	-0.005911	-3.97	1585.21		509256	66	80	0		JS_UASM_FFPE23.20529.20529.3 File:"JS_UASM_FFPE23.raw", NativeID:"controllerType=0 controllerNumber=1 scan=20529"
(K)RAATDADAVTVGTLK(T)	1	62.11	25	45.09	2		744.902	1487.79	2	-0.005044	-3.388	1586.71		211441	66	80	0		JS_UASM_FFPE23.20567.20567.2 File:"JS_UASM_FFPE23.raw", NativeID:"controllerType=0 controllerNumber=1 scan=20567"
(K)RAATDADAVTVGTLK(T)	1	28	25	28	2		496.937	1487.79	3	-0.004447	-2.987	1615.89		473389	66	80	0		JS_UASM_FFPE23.21293.21293.3 File:"JS_UASM_FFPE23.raw", NativeID:"controllerType=0 controllerNumber=1 scan=21293"
(K)RAATDADAVTVGTLK(T)	0.97	19.18	25	13.76	2		496.937	1487.79	3	-0.004996	-3.356	1646.69		443231	66	80	0		JS_UASM_FFPE23.22074.22074.3 File:"JS_UASM_FFPE23.raw", NativeID:"controllerType=0 controllerNumber=1 scan=22074"
(K)RAATDADAVTVGTLK(T)	1	38.4	25	28.03	2		744.901	1487.79	2	-0.006998	-4.7	1590.2		302700	66	80	0		JS_UASM_FFPE26.19248.19248.2 File:"JS_UASM_FFPE26.raw", NativeID:"controllerType=0 controllerNumber=1 scan=19248"
(K)RAATDADAVTVGTLK(T)	0.98	21.75	25	15.85	2		496.937	1487.79	3	-0.004813	-3.233	1626.03		305574	66	80	0		JS_UASM_FFPE26.19937.19937.3 File:"JS_UASM_FFPE26.raw", NativeID:"controllerType=0 controllerNumber=1 scan=19937"
(R)AATDADAVTVGTLK(T)	1	44.39	25	36.3	2		666.851	1331.69	2	-0.005874	-4.408	1772.08		319012	67	80	0		JS_UASM_FFPE23.25310.25310.2 File:"JS_UASM_FFPE23.raw", NativeID:"controllerType=0 controllerNumber=1 scan=25310"
(R)AATDADAVTVGTLK(T)	1	54.26	25	47.27	2		666.852	1331.69	2	-0.002944	-2.209	1804.46		412014	67	80	0		JS_UASM_FFPE23.26154.26154.2 File:"JS_UASM_FFPE23.raw", NativeID:"controllerType=0 controllerNumber=1 scan=26154"
(R)AATDADAVTVGTLK(T)	1	63.57	25	55.8	2		666.853	1331.69	2	-0.002334	-1.751	1838.32		364618	67	80	0		JS_UASM_FFPE23.27023.27023.2 File:"JS_UASM_FFPE23.raw", NativeID:"controllerType=0 controllerNumber=1 scan=27023"
(R)AATDADAVTVGTLK(T)	1	80.4	25	75.93	2		666.852	1331.69	2	-0.003798	-2.85	1872.1		1047890	67	80	0		JS_UASM_FFPE23.27885.27885.2 File:"JS_UASM_FFPE23.raw", NativeID:"controllerType=0 controllerNumber=1 scan=27885"
(R)AATDADAVTVGTLK(T)	1	93.77	25	78.26	2		666.852	1331.69	2	-0.003554	-2.667	1904.05		1968070	67	80	0		JS_UASM_FFPE23.28706.28706.2 File:"JS_UASM_FFPE23.raw", NativeID:"controllerType=0 controllerNumber=1 scan=28706"
(R)AATDADAVTVGTLK(T)	1	72.53	25	53.74	2		666.865	1331.72	2	0.0222	16.66	1920.83		1568080	67	80	0		JS_UASM_FFPE23.29126.29126.2 File:"JS_UASM_FFPE23.raw", NativeID:"controllerType=0 controllerNumber=1 scan=29126"
(R)AATDADAVTVGTLK(T)	1	64.09	25	46.2	2		666.852	1331.69	2	-0.003676	-2.758	1938.91		976984	67	80	0		JS_UASM_FFPE23.29583.29583.2 File:"JS_UASM_FFPE23.raw", NativeID:"controllerType=0 controllerNumber=1 scan=29583"
(R)AATDADAVTVGTLK(T)	1	64.08	25	52.61	2		666.865	1331.71	2	0.02135	16.02	1954.38		807895	67	80	0		JS_UASM_FFPE23.29969.29969.2 File:"JS_UASM_FFPE23.raw", NativeID:"controllerType=0 controllerNumber=1 scan=29969"
(R)AATDADAVTVGTLK(T)	1	64.19	25	54.84	2		666.852	1331.69	2	-0.003188	-2.392	1970.72		626165	67	80	0		JS_UASM_FFPE23.30368.30368.2 File:"JS_UASM_FFPE23.raw", NativeID:"controllerType=0 controllerNumber=1 scan=30368"
(R)AATDADAVTVGTLK(T)	1	63.53	25	34.38	2		666.865	1331.72	2	0.02208	16.57	1988.56		445624	67	80	0		JS_UASM_FFPE23.30810.30810.2 File:"JS_UASM_FFPE23.raw", NativeID:"controllerType=0 controllerNumber=1 scan=30810"
(R)AATDADAVTVGTLK(T)	1	39.46	25	20.39	2		666.853	1331.69	2	-0.001234	-0.9259	2002.37		416878	67	80	0		JS_UASM_FFPE23.31159.31159.2 File:"JS_UASM_FFPE23.raw", NativeID:"controllerType=0 controllerNumber=1 scan=31159"
(R)AATDADAVTVGTLK(T)	1	51.51	25	39.93	2		666.852	1331.69	2	-0.004042	-3.033	2036.36		283386	67	80	0		JS_UASM_FFPE23.32018.32018.2 File:"JS_UASM_FFPE23.raw", NativeID:"controllerType=0 controllerNumber=1 scan=32018"
(R)AATDADAVTVGTLKTAGTAIGK(S)	1	41.98	25	41.98	2		1016.55	2031.08	2	-0.002432	-1.197	2567.66		153291	67	88	0		JS_UASM_FFPE23.45426.45426.2 File:"JS_UASM_FFPE23.raw", NativeID:"controllerType=0 controllerNumber=1 scan=45426"
(R)AATDADAVTVGTLKTAGTAIGK(S)	1	35.09	25	31.2	2		678.033	2031.08	3	-0.008487	-4.176	2586.07		400353	67	88	0		JS_UASM_FFPE23.45885.45885.3 File:"JS_UASM_FFPE23.raw", NativeID:"controllerType=0 controllerNumber=1 scan=45885"
(R)AATDADAVTVGTLK(T)	1	22.7	25	17.69	2		666.851	1331.69	2	-0.005386	-4.041	1772.32		243777	67	80	0		JS_UASM_FFPE26.23177.23177.2 File:"JS_UASM_FFPE26.raw", NativeID:"controllerType=0 controllerNumber=1 scan=23177"
(R)AATDADAVTVGTLK(T)	1	36.27	25	36.27	2		666.825	1331.64	2	-0.05714	-42.88	1774.68		249046	67	80	0		JS_UASM_FFPE26.23235.23235.2 File:"JS_UASM_FFPE26.raw", NativeID:"controllerType=0 controllerNumber=1 scan=23235"
(R)AATDADAVTVGTLK(T)	1	59.37	25	59.37	2		666.852	1331.69	2	-0.003554	-2.667	1805.47		349944	67	80	0		JS_UASM_FFPE26.23990.23990.2 File:"JS_UASM_FFPE26.raw", NativeID:"controllerType=0 controllerNumber=1 scan=23990"
(R)AATDADAVTVGTLK(T)	1	47.61	25	41.97	2		666.853	1331.69	2	-0.002456	-1.843	1839.22		318884	67	80	0		JS_UASM_FFPE26.24803.24803.2 File:"JS_UASM_FFPE26.raw", NativeID:"controllerType=0 controllerNumber=1 scan=24803"
(R)AATDADAVTVGTLK(T)	1	78.8	25	75.48	2		666.852	1331.69	2	-0.003188	-2.392	1872.58		493250	67	80	0		JS_UASM_FFPE26.25605.25605.2 File:"JS_UASM_FFPE26.raw", NativeID:"controllerType=0 controllerNumber=1 scan=25605"
(R)AATDADAVTVGTLK(T)	1	81.98	25	77.49	2		666.852	1331.69	2	-0.003676	-2.758	1905.51		1340430	67	80	0		JS_UASM_FFPE26.26411.26411.2 File:"JS_UASM_FFPE26.raw", NativeID:"controllerType=0 controllerNumber=1 scan=26411"
(R)AATDADAVTVGTLK(T)	1	73.78	25	60.52	2		666.865	1331.71	2	0.02147	16.11	1912.94		1247430	67	80	0		JS_UASM_FFPE26.26598.26598.2 File:"JS_UASM_FFPE26.raw", NativeID:"controllerType=0 controllerNumber=1 scan=26598"
(R)AATDADAVTVGTLK(T)	1	52.43	25	26.3	2		666.852	1331.69	2	-0.004042	-3.033	1939.9		823176	67	80	0		JS_UASM_FFPE26.27277.27277.2 File:"JS_UASM_FFPE26.raw", NativeID:"controllerType=0 controllerNumber=1 scan=27277"
(R)AATDADAVTVGTLK(T)	1	59.94	25	37.83	2		666.865	1331.72	2	0.02257	16.93	1947.51		663538	67	80	0		JS_UASM_FFPE26.27464.27464.2 File:"JS_UASM_FFPE26.raw", NativeID:"controllerType=0 controllerNumber=1 scan=27464"
(R)AATDADAVTVGTLK(T)	1	66.72	25	30.09	2		666.852	1331.69	2	-0.004164	-3.124	1973.11		420501	67	80	0		JS_UASM_FFPE26.28081.28081.2 File:"JS_UASM_FFPE26.raw", NativeID:"controllerType=0 controllerNumber=1 scan=28081"
(R)AATDADAVTVGTLK(T)	1	61.6	25	43	2		666.867	1331.72	2	0.02696	20.23	1980.46		356197	67	80	0		JS_UASM_FFPE26.28259.28259.2 File:"JS_UASM_FFPE26.raw", NativeID:"controllerType=0 controllerNumber=1 scan=28259"
(R)AATDADAVTVGTLK(T)	1	24.69	25	19.53	2		666.852	1331.69	2	-0.00392	-2.941	2008.57		285629	67	80	0		JS_UASM_FFPE26.28932.28932.2 File:"JS_UASM_FFPE26.raw", NativeID:"controllerType=0 controllerNumber=1 scan=28932"
(R)AATDADAVTVGTLK(T)	1	27.15	25	12.27	2		666.852	1331.69	2	-0.003188	-2.392	2052.06		204721	67	80	0		JS_UASM_FFPE26.29965.29965.2 File:"JS_UASM_FFPE26.raw", NativeID:"controllerType=0 controllerNumber=1 scan=29965"
(R)AATDADAVTVGTLKTAGTAIGK(S)	1	31.62	25	31.62	2		678.033	2031.08	3	-0.007206	-3.546	2566.53		305734	67	88	0		JS_UASM_FFPE26.42332.42332.3 File:"JS_UASM_FFPE26.raw", NativeID:"controllerType=0 controllerNumber=1 scan=42332"
(R)AATDADAVTVGTLKTAGTAIGK(S)	0.99	21.96	25	7.01	2		678.033	2031.08	3	-0.007206	-3.546	2601.44		250898	67	88	0		JS_UASM_FFPE26.43162.43162.3 File:"JS_UASM_FFPE26.raw", NativeID:"controllerType=0 controllerNumber=1 scan=43162"
(K)TAGTAIGKSSGGAVSLEQTADQGSK(A)	1	27.11	25	20.92	2		774.388	2320.14	3	-0.007697	-3.316	1712.14		243154	81	105	0		JS_UASM_FFPE23.23744.23744.3 File:"JS_UASM_FFPE23.raw", NativeID:"controllerType=0 controllerNumber=1 scan=23744"
(K)TAGTAIGKSSGGAVSLEQTADqGSK(A)	1	32.46	25	0.08	2	Deamidated (+1)	774.723	2321.15	3	0.01134	4.882	1713.8		261165	81	105	0		JS_UASM_FFPE23.23787.23787.3 File:"JS_UASM_FFPE23.raw", NativeID:"controllerType=0 controllerNumber=1 scan=23787"
(K)TAGTAIGKSSGGAVSLEQTADQGSK(A)	1	28.69	25	21.94	2		774.389	2320.14	3	-0.007148	-3.079	1743.69		347271	81	105	0		JS_UASM_FFPE23.24572.24572.3 File:"JS_UASM_FFPE23.raw", NativeID:"controllerType=0 controllerNumber=1 scan=24572"
(K)TAGTAIGKSSGGAVSLEqTADQGSK(A)	0.96	22.38	25	8.28	2	Deamidated (+1)	774.722	2321.14	3	0.008592	3.7	1764.8		261174	81	105	0		JS_UASM_FFPE23.25119.25119.3 File:"JS_UASM_FFPE23.raw", NativeID:"controllerType=0 controllerNumber=1 scan=25119"
(K)TAGTAIGKSSGGAVSLEqTADQGSK(A)	0.99	29.02	25	1.43	2	Deamidated (+1)	774.722	2321.14	3	0.009324	4.015	1745.31		277604	81	105	0		JS_UASM_FFPE26.22529.22529.3 File:"JS_UASM_FFPE26.raw", NativeID:"controllerType=0 controllerNumber=1 scan=22529"
(K)TAGTAIGKSSGGAVSLEQTADQGSK(A)	0.97	23.2	25	13.96	2		774.388	2320.14	3	-0.009164	-3.948	1774.86		302218	81	105	0		JS_UASM_FFPE26.23240.23240.3 File:"JS_UASM_FFPE26.raw", NativeID:"controllerType=0 controllerNumber=1 scan=23240"
(K)SSGGAVSLEQTADQGSK(A)	1	33.75	25	28.73	2		811.386	1620.76	2	-0.001972	-1.216	1334.32		68487.2	89	105	0		JS_UASM_FFPE23.14266.14266.2 File:"JS_UASM_FFPE23.raw", NativeID:"controllerType=0 controllerNumber=1 scan=14266"
(K)SSGGAVSLEQTADQGSK(A)	1	53.54	25	53.54	2		811.385	1620.76	2	-0.00368	-2.269	1366.33		82600.5	89	105	0		JS_UASM_FFPE23.15054.15054.2 File:"JS_UASM_FFPE23.raw", NativeID:"controllerType=0 controllerNumber=1 scan=15054"
(K)SSGGAVSLEqTADQGSK(A)	1	65.55	25	13.91	2	Deamidated (+1)	811.885	1621.76	2	0.01291	7.958	1371.39		83194	89	105	0		JS_UASM_FFPE23.15177.15177.2 File:"JS_UASM_FFPE23.raw", NativeID:"controllerType=0 controllerNumber=1 scan=15177"
(K)SSGGAVSLEQTADQGSK(A)	1	68.52	25	63.61	2		811.384	1620.75	2	-0.006732	-4.151	1401.96		81308.2	89	105	0		JS_UASM_FFPE23.15936.15936.2 File:"JS_UASM_FFPE23.raw", NativeID:"controllerType=0 controllerNumber=1 scan=15936"
(K)SSGGAVSLEQTADQGSK(A)	1	55.22	25	55.22	2		811.384	1620.75	2	-0.005024	-3.098	1444.77		87433.5	89	105	0		JS_UASM_FFPE23.17008.17008.2 File:"JS_UASM_FFPE23.raw", NativeID:"controllerType=0 controllerNumber=1 scan=17008"
(K)SSGGAVSLEQTADQGSKAGVK(V)	1	62.02	25	50.18	2		659.666	1975.98	3	-0.005968	-3.019	1462.85		205346	89	109	0		JS_UASM_FFPE23.17467.17467.3 File:"JS_UASM_FFPE23.raw", NativeID:"controllerType=0 controllerNumber=1 scan=17467"
(K)SSGGAVSLEQTADQGSK(A)	1	108.42	25	108.42	2		811.385	1620.75	2	-0.00478	-2.947	1477.57		598211	89	105	0		JS_UASM_FFPE23.17834.17834.2 File:"JS_UASM_FFPE23.raw", NativeID:"controllerType=0 controllerNumber=1 scan=17834"
(K)SSGGAVSLEQTADQGSK(A)	1	124.98	25	115.11	2		811.385	1620.76	2	-0.00368	-2.269	1511.1		601521	89	105	0		JS_UASM_FFPE23.18656.18656.2 File:"JS_UASM_FFPE23.raw", NativeID:"controllerType=0 controllerNumber=1 scan=18656"
(K)SSGGAVSLEQTADQGSK(A)	1	95.24	25	87.32	2		811.385	1620.76	2	-0.003802	-2.344	1543.85		367537	89	105	0		JS_UASM_FFPE23.19472.19472.2 File:"JS_UASM_FFPE23.raw", NativeID:"controllerType=0 controllerNumber=1 scan=19472"
(K)SSGGAVSLEQTADQGSK(A)	1	70.23	25	70.23	2		811.384	1620.75	2	-0.005756	-3.549	1575.61		179170	89	105	0		JS_UASM_FFPE23.20282.20282.2 File:"JS_UASM_FFPE23.raw", NativeID:"controllerType=0 controllerNumber=1 scan=20282"
(K)SSGGAVSLEqTADQGSK(A)	1	74.73	25	4	2	Deamidated (+1)	811.885	1621.76	2	0.01218	7.507	1587.67		151193	89	105	0		JS_UASM_FFPE23.20592.20592.2 File:"JS_UASM_FFPE23.raw", NativeID:"controllerType=0 controllerNumber=1 scan=20592"
(K)SSGGAVSLEQTADQGSK(A)	1	53.79	25	53.79	2		811.384	1620.75	2	-0.005878	-3.624	1623.1		94594.5	89	105	0		JS_UASM_FFPE23.21475.21475.2 File:"JS_UASM_FFPE23.raw", NativeID:"controllerType=0 controllerNumber=1 scan=21475"
(K)SSGGAVSLEQTADQGSK(A)	1	41.19	25	35.25	2		811.384	1620.75	2	-0.00539	-3.324	1358.95		78446.1	89	105	0		JS_UASM_FFPE26.13820.13820.2 File:"JS_UASM_FFPE26.raw", NativeID:"controllerType=0 controllerNumber=1 scan=13820"
(K)SSGGAVSLEqTADQGSK(A)	1	50.26	25	2.44	2	Deamidated (+1)	811.888	1621.76	2	0.01743	10.74	1369.26		76767.5	89	105	0		JS_UASM_FFPE26.14056.14056.2 File:"JS_UASM_FFPE26.raw", NativeID:"controllerType=0 controllerNumber=1 scan=14056"
(K)SSGGAVSLEQTADQGSK(A)	1	60.33	25	54.06	2		811.384	1620.75	2	-0.006244	-3.85	1391.11		76241.9	89	105	0		JS_UASM_FFPE26.14560.14560.2 File:"JS_UASM_FFPE26.raw", NativeID:"controllerType=0 controllerNumber=1 scan=14560"
(K)SSGGAVSLEQTADQGSK(A)	1	101.01	25	96.92	2		811.384	1620.75	2	-0.005756	-3.549	1466.17		154411	89	105	0		JS_UASM_FFPE26.16318.16318.2 File:"JS_UASM_FFPE26.raw", NativeID:"controllerType=0 controllerNumber=1 scan=16318"
(K)SSGGAVSLEQTADQGSKAGVK(V)	1	30.94	25	26.52	2		659.666	1975.98	3	-0.004684	-2.369	1472.23		168193	89	109	0		JS_UASM_FFPE26.16462.16462.3 File:"JS_UASM_FFPE26.raw", NativeID:"controllerType=0 controllerNumber=1 scan=16462"
(K)SSGGAVSLEqTADQGSKAGVK(V)	0.97	23.5	25	2.85	2	Deamidated (+1)	659.999	1976.97	3	0.008674	4.385	1489.46		187854	89	109	0		JS_UASM_FFPE26.16869.16869.3 File:"JS_UASM_FFPE26.raw", NativeID:"controllerType=0 controllerNumber=1 scan=16869"
(K)SSGGAVSLEQTADQGSK(A)	1	106.14	25	101.21	2		811.385	1620.76	2	-0.004046	-2.495	1500.58		446012	89	105	0		JS_UASM_FFPE26.17131.17131.2 File:"JS_UASM_FFPE26.raw", NativeID:"controllerType=0 controllerNumber=1 scan=17131"
(K)SSGGAVSLEQTADQGSK(A)	1	109.33	25	107.03	2		811.385	1620.76	2	-0.003436	-2.119	1536.02		276490	89	105	0		JS_UASM_FFPE26.17967.17967.2 File:"JS_UASM_FFPE26.raw", NativeID:"controllerType=0 controllerNumber=1 scan=17967"
(K)SSGGAVSLEQTADQGSK(A)	1	63.88	25	57.55	2		811.382	1620.75	2	-0.009906	-6.108	1569.93		125405	89	105	0		JS_UASM_FFPE26.18782.18782.2 File:"JS_UASM_FFPE26.raw", NativeID:"controllerType=0 controllerNumber=1 scan=18782"
(K)SSGGAVSLEqTADQGSK(A)	1	89	25	21.43	2	Deamidated (+1)	811.885	1621.75	2	0.01145	7.056	1581.2		111615	89	105	0		JS_UASM_FFPE26.19048.19048.2 File:"JS_UASM_FFPE26.raw", NativeID:"controllerType=0 controllerNumber=1 scan=19048"
(K)AGVKVDLYSqR(A)	1	39.62	25	38.04	2	Deamidated (+1)	618.808	1235.6	2	-0.0493	-39.87	1539.94		470173	106	116	0		JS_UASM_FFPE23.19375.19375.2 File:"JS_UASM_FFPE23.raw", NativeID:"controllerType=0 controllerNumber=1 scan=19375"
(K)AGVKVDLYSQR(A)	1	26.38	25	26.38	2		412.562	1234.66	3	-0.003228	-2.612	1547.56		1978580	106	116	0		JS_UASM_FFPE23.19563.19563.3 File:"JS_UASM_FFPE23.raw", NativeID:"controllerType=0 controllerNumber=1 scan=19563"
(K)AGVKVDLYSQR(A)	1	60.23	25	60.23	2		618.338	1234.66	2	-0.00523	-4.232	1562.36		554091	106	116	0		JS_UASM_FFPE23.19941.19941.2 File:"JS_UASM_FFPE23.raw", NativeID:"controllerType=0 controllerNumber=1 scan=19941"
(K)AGVKVDLYSqR(A)	1	51.64	25	45.31	2	Deamidated (+1)	618.81	1235.6	2	-0.04625	-37.4	1573.37		608439	106	116	0		JS_UASM_FFPE23.20224.20224.2 File:"JS_UASM_FFPE23.raw", NativeID:"controllerType=0 controllerNumber=1 scan=20224"
(K)AGVKVDLYSQR(A)	1	66.32	25	66.32	2		618.339	1234.66	2	-0.004376	-3.541	1592.8		483483	106	116	0		JS_UASM_FFPE23.20718.20718.2 File:"JS_UASM_FFPE23.raw", NativeID:"controllerType=0 controllerNumber=1 scan=20718"
(K)AGVKVDLYSqR(A)	1	50.91	25	43.38	2	Deamidated (+1)	618.821	1235.63	2	-0.0244	-19.73	1608.89		463686	106	116	0		JS_UASM_FFPE23.21118.21118.2 File:"JS_UASM_FFPE23.raw", NativeID:"controllerType=0 controllerNumber=1 scan=21118"
(K)AGVKVDLYSQR(A)	1	50.4	25	43.22	2		618.338	1234.66	2	-0.005962	-4.825	1623.43		426640	106	116	0		JS_UASM_FFPE23.21483.21483.2 File:"JS_UASM_FFPE23.raw", NativeID:"controllerType=0 controllerNumber=1 scan=21483"
(K)AGVKVDLYSqR(A)	1	39.28	25	30.4	2	Deamidated (+1)	618.84	1235.67	2	0.0149	12.05	1627.85		360941	106	116	0		JS_UASM_FFPE23.21594.21594.2 File:"JS_UASM_FFPE23.raw", NativeID:"controllerType=0 controllerNumber=1 scan=21594"
(K)AGVKVDLYSQR(A)	1	27.92	25	13.24	2		618.339	1234.66	2	-0.004498	-3.64	1654.6		401204	106	116	0		JS_UASM_FFPE23.22275.22275.2 File:"JS_UASM_FFPE23.raw", NativeID:"controllerType=0 controllerNumber=1 scan=22275"
(K)AGVKVDLYSqR(A)	0.99	29.05	25	16.34	2	Deamidated (+1)	618.841	1235.67	2	0.01674	13.53	1675.73		325855	106	116	0		JS_UASM_FFPE23.22810.22810.2 File:"JS_UASM_FFPE23.raw", NativeID:"controllerType=0 controllerNumber=1 scan=22810"
(K)AGVKVDLYSQR(A)	1	25.97	25	25.97	2		618.338	1234.66	2	-0.004986	-4.035	1546.64		260930	106	116	0		JS_UASM_FFPE26.18218.18218.2 File:"JS_UASM_FFPE26.raw", NativeID:"controllerType=0 controllerNumber=1 scan=18218"
(K)AGVKVDLYSQR(A)	1	49.24	25	43.91	2		618.338	1234.66	2	-0.005596	-4.529	1577.5		345113	106	116	0		JS_UASM_FFPE26.18969.18969.2 File:"JS_UASM_FFPE26.raw", NativeID:"controllerType=0 controllerNumber=1 scan=18969"
(K)AGVKVDLYSqR(A)	1	38.47	25	33.56	2	Deamidated (+1)	618.808	1235.6	2	-0.04979	-40.27	1587.02		359997	106	116	0		JS_UASM_FFPE26.19177.19177.2 File:"JS_UASM_FFPE26.raw", NativeID:"controllerType=0 controllerNumber=1 scan=19177"
(K)AGVKVDLYSqR(A)	1	44.94	25	42.07	2	Deamidated (+1)	618.84	1235.66	2	0.01381	11.16	1594.62		347497	106	116	0		JS_UASM_FFPE26.19341.19341.2 File:"JS_UASM_FFPE26.raw", NativeID:"controllerType=0 controllerNumber=1 scan=19341"
(K)AGVKVDLYSQR(A)	1	68.43	25	68.43	2		618.339	1234.66	2	-0.003278	-2.653	1608.41		280118	106	116	0		JS_UASM_FFPE26.19607.19607.2 File:"JS_UASM_FFPE26.raw", NativeID:"controllerType=0 controllerNumber=1 scan=19607"
(K)AGVKVDLYSqR(A)	1	40.89	25	27.61	2	Deamidated (+1)	618.84	1235.67	2	0.01454	11.76	1636.72		267026	106	116	0		JS_UASM_FFPE26.20150.20150.2 File:"JS_UASM_FFPE26.raw", NativeID:"controllerType=0 controllerNumber=1 scan=20150"
(K)AGVKVDLYSQR(A)	1	35.21	25	21.56	2		618.339	1234.66	2	-0.004498	-3.64	1640.19		269390	106	116	0		JS_UASM_FFPE26.20209.20209.2 File:"JS_UASM_FFPE26.raw", NativeID:"controllerType=0 controllerNumber=1 scan=20209"
(R)AGATEGSAASTSATKVKcKPGFSK(G)	0.99	26.29	25	21.37	2	Carbamidomethyl (+57)	586.05	2340.17	4	-0.004175	-1.783	1091.9		74255.5	117	140	0		JS_UASM_FFPE23.8794.8794.4 File:"JS_UASM_FFPE23.raw", NativeID:"controllerType=0 controllerNumber=1 scan=8794"
(R)GIGDGTTSRADSQTKTSTTGDGRSEADQR(S)	0.98	21.53	25	7.61	2		985.79	2954.35	3	-0.007649	-2.588	1061.19		9204.7	241	269	0		JS_UASM_FFPE23.8126.8126.3 File:"JS_UASM_FFPE23.raw", NativeID:"controllerType=0 controllerNumber=1 scan=8126"
(R)GIGDGTTSRADSQTKTSTTGDGRSEADQR(S)	0.99	27.64	25	21.74	2		739.594	2954.35	4	-0.01029	-3.48	1066.71		69037.1	241	269	0		JS_UASM_FFPE23.8246.8246.4 File:"JS_UASM_FFPE23.raw", NativeID:"controllerType=0 controllerNumber=1 scan=8246"
(R)GIGDGTTSRADSQTKTSTTGDGRSEADQR(S)	1	35.34	25	25.82	2		739.594	2954.35	4	-0.008578	-2.903	1099.94		49964.2	241	269	0		JS_UASM_FFPE23.8968.8968.4 File:"JS_UASM_FFPE23.raw", NativeID:"controllerType=0 controllerNumber=1 scan=8968"
(R)GIGDGTTSRADSQTKTSTTGDGRSEADQR(S)	0.99	25.58	25	9.31	2		739.595	2954.35	4	-0.006866	-2.323	1040.47		43964.6	241	269	0		JS_UASM_FFPE26.6777.6777.4 File:"JS_UASM_FFPE26.raw", NativeID:"controllerType=0 controllerNumber=1 scan=6777"
(R)GIGDGTTSRADSQTKTSTTGDGRSEADQR(S)	0.97	23.72	25	7.98	2		739.594	2954.35	4	-0.01053	-3.563	1074.72		79555.7	241	269	0		JS_UASM_FFPE26.7500.7500.4 File:"JS_UASM_FFPE26.raw", NativeID:"controllerType=0 controllerNumber=1 scan=7500"
(K)RGALGAETSAqTTGSSATVGGGSDSKGESSAGGTANQGSNVAAESDSNqKIR(S)	0.98	35.79	25	12.93	2	Deamidated (+1), Deamidated (+1)	812.731	4870.34	6	0.1111	22.82	3758.6		336378	280	331	0		JS_UASM_FFPE23.74437.74437.6 File:"JS_UASM_FFPE23.raw", NativeID:"controllerType=0 controllerNumber=1 scan=74437"
(R)GALGAETSAqTTGSSATVGGGSDSKGESSAGGTANQGSNVAAESDSNQKIR(S)	1	88.11	25	1.49	2	Deamidated (+1)	1179.3	4713.16	4	0.009646	2.046	1769.1		101372	281	331	0		JS_UASM_FFPE23.25234.25234.4 File:"JS_UASM_FFPE23.raw", NativeID:"controllerType=0 controllerNumber=1 scan=25234"
(R)GALGAETSAQTTGSSATVGGGSDSKGESSAGGTAnQGSNVAAESDSnQKIR(S)	1	39.51	25	0.6	2	Deamidated (+1), Deamidated (+1)	943.841	4714.17	5	0.03672	7.788	1795.47		83283.8	281	331	0		JS_UASM_FFPE23.25923.25923.5 File:"JS_UASM_FFPE23.raw", NativeID:"controllerType=0 controllerNumber=1 scan=25923"
(R)GALGAETSAQTTGSSATVGGGSDSKGESSAGGTANQGSNVAAESDSNQKIR(S)	1	117.65	25	95.72	2		1179.05	4712.16	4	-0.0004779	-0.1014	1800.61		156889	281	331	0		JS_UASM_FFPE23.26056.26056.4 File:"JS_UASM_FFPE23.raw", NativeID:"controllerType=0 controllerNumber=1 scan=26056"
(R)GALGAETSAQTTGSSATVGGGSDSKGESSAGGTAnQGSNVAAESDSNQKIR(S)	1	139.98	25	3.35	2	Deamidated (+1)	1179.3	4713.16	4	0.01355	2.874	1802.7		141885	281	331	0		JS_UASM_FFPE23.26109.26109.4 File:"JS_UASM_FFPE23.raw", NativeID:"controllerType=0 controllerNumber=1 scan=26109"
(R)GALGAETSAqTTGSSATVGGGSDSKGESSAGGTAnQGSNVAAESDSNqKIR(S)	1	63.98	25	2.22	2	Deamidated (+1), Deamidated (+1), Deamidated (+1)	944.037	4715.15	5	0.03538	7.501	1816.02		93258.6	281	331	0		JS_UASM_FFPE23.26454.26454.5 File:"JS_UASM_FFPE23.raw", NativeID:"controllerType=0 controllerNumber=1 scan=26454"
(R)GALGAETSAQTTGSSATVGGGSDSKGESSAGGTANQGSNVAAESDSNQKIR(S)	1	50.88	25	42.33	2		943.436	4712.14	5	-0.01947	-4.132	1820.84		90692.7	281	331	0		JS_UASM_FFPE23.26577.26577.5 File:"JS_UASM_FFPE23.raw", NativeID:"controllerType=0 controllerNumber=1 scan=26577"
(R)GALGAETSAqTTGSSATVGGGSDSKGESSAGGTANQGSNVAAESDSNQKIR(S)	1	76.18	25	5.33	2	Deamidated (+1)	943.641	4713.17	5	0.02281	4.839	1838.83		98958.8	281	331	0		JS_UASM_FFPE23.27036.27036.5 File:"JS_UASM_FFPE23.raw", NativeID:"controllerType=0 controllerNumber=1 scan=27036"
(R)GALGAETSAqTTGSSATVGGGSDSKGESSAGGTANQGSNVAAESDSnQKIR(S)	1	57.41	25	7.63	2	Deamidated (+1), Deamidated (+1)	943.835	4714.14	5	0.008648	1.834	1851.61		101101	281	331	0		JS_UASM_FFPE23.27366.27366.5 File:"JS_UASM_FFPE23.raw", NativeID:"controllerType=0 controllerNumber=1 scan=27366"
(R)GALGAETSAQTTGSSATVGGGSDSKGESSAGGTANqGSnVAAESDSnQKIR(S)	1	38.83	25	4.95	2	Deamidated (+1), Deamidated (+1), Deamidated (+1)	944.035	4715.14	5	0.02195	4.654	1882.28		109051	281	331	0		JS_UASM_FFPE23.28149.28149.5 File:"JS_UASM_FFPE23.raw", NativeID:"controllerType=0 controllerNumber=1 scan=28149"
(R)GALGAETSAqTTGSSATVGGGSDSKGESSAGGTANQGSNVAAESDSnQKIR(S)	1	47.19	25	1.42	2	Deamidated (+1), Deamidated (+1)	943.836	4714.14	5	0.01231	2.611	1888.07		106763	281	331	0		JS_UASM_FFPE23.28300.28300.5 File:"JS_UASM_FFPE23.raw", NativeID:"controllerType=0 controllerNumber=1 scan=28300"
(R)GALGAETSAQTTGSSATVGGGSDSKGESSAGGTANQGSNVAAESDSnQKIR(S)	1	86.09	25	0.74	2	Deamidated (+1)	1179.29	4713.14	4	-0.00305	-0.647	1890.45		154166	281	331	0		JS_UASM_FFPE23.28358.28358.4 File:"JS_UASM_FFPE23.raw", NativeID:"controllerType=0 controllerNumber=1 scan=28358"
(R)GALGAETSAQTTGSSATVGGGSDSKGESSAGGTANqGSNVAAESDSnQKIR(S)	1	113.41	25	1.04	2	Deamidated (+1), Deamidated (+1)	1179.54	4714.14	4	0.01098	2.329	1892.04		147099	281	331	0		JS_UASM_FFPE23.28401.28401.4 File:"JS_UASM_FFPE23.raw", NativeID:"controllerType=0 controllerNumber=1 scan=28401"
(R)GALGAETSAqTTGSSATVGGGSDSKGESSAGGTAnQGSNVAAESDSNqKIR(S)	1	107.44	25	6.24	2	Deamidated (+1), Deamidated (+1), Deamidated (+1)	1179.8	4715.16	4	0.04357	9.238	1902.49		127079	281	331	0		JS_UASM_FFPE23.28668.28668.4 File:"JS_UASM_FFPE23.raw", NativeID:"controllerType=0 controllerNumber=1 scan=28668"
(R)GALGAETSAQTTGSSATVGGGSDSKGESSAGGTANqGSnVAAESDSnQKIR(S)	0.97	30.23	25	5.98	2	Deamidated (+1), Deamidated (+1), Deamidated (+1)	944.035	4715.14	5	0.02378	5.042	1919.26		95979.9	281	331	0		JS_UASM_FFPE23.29087.29087.5 File:"JS_UASM_FFPE23.raw", NativeID:"controllerType=0 controllerNumber=1 scan=29087"
(R)GALGAETSAQTTGSSATVGGGSDSKGESSAGGTANQGSNVAAESDSnQKIR(S)	1	70.99	25	0	2	Deamidated (+1)	1179.29	4713.14	4	-0.005002	-1.061	1936.68		83890.8	281	331	0		JS_UASM_FFPE23.29527.29527.4 File:"JS_UASM_FFPE23.raw", NativeID:"controllerType=0 controllerNumber=1 scan=29527"
(R)GALGAETSAQTTGSSATVGGGSDSKGESSAGGTAnQGSnVAAESDSNQKIR(S)	1	122.54	25	1.45	2	Deamidated (+1), Deamidated (+1)	1179.55	4714.16	4	0.02563	5.436	1816.78		95091	281	331	0		JS_UASM_FFPE26.24270.24270.4 File:"JS_UASM_FFPE26.raw", NativeID:"controllerType=0 controllerNumber=1 scan=24270"
(R)GALGAETSAqTTGSSATVGGGSDSKGESSAGGTANQGSNVAAESDSNQKIR(S)	0.96	29.74	25	0.57	2	Deamidated (+1)	943.638	4713.15	5	0.006029	1.279	1841.09		78701.7	281	331	0		JS_UASM_FFPE26.24849.24849.5 File:"JS_UASM_FFPE26.raw", NativeID:"controllerType=0 controllerNumber=1 scan=24849"
(R)GALGAETSAqTTGSSATVGGGSDSKGESSAGGTANQGSNVAAESDSnQKIR(S)	1	118.2	25	0.78	2	Deamidated (+1), Deamidated (+1)	1179.54	4714.14	4	0.00561	1.19	1854.11		104121	281	331	0		JS_UASM_FFPE26.25157.25157.4 File:"JS_UASM_FFPE26.raw", NativeID:"controllerType=0 controllerNumber=1 scan=25157"
(R)GALGAETSAqTTGSSATVGGGSDSKGESSAGGTANQGSNVAAESDSNqKIR(S)	1	54.95	25	0	2	Deamidated (+1), Deamidated (+1)	943.84	4714.16	5	0.03154	6.689	1862.59		78286.9	281	331	0		JS_UASM_FFPE26.25363.25363.5 File:"JS_UASM_FFPE26.raw", NativeID:"controllerType=0 controllerNumber=1 scan=25363"
(R)GALGAETSAqTTGSSATVGGGSDSKGESSAGGTAnQGSNVAAESDSNqKIR(S)	1	53.71	25	2.04	2	Deamidated (+1), Deamidated (+1), Deamidated (+1)	944.035	4715.14	5	0.02561	5.43	1866.51		75458	281	331	0		JS_UASM_FFPE26.25458.25458.5 File:"JS_UASM_FFPE26.raw", NativeID:"controllerType=0 controllerNumber=1 scan=25458"
(R)GALGAETSAQTTGSSATVGGGSDSKGESSAGGTANQGSNVAAESDSNqKIR(S)	1	90.06	25	0	2	Deamidated (+1)	1179.3	4713.15	4	0.00525	1.114	1877.88		112902	281	331	0		JS_UASM_FFPE26.25735.25735.4 File:"JS_UASM_FFPE26.raw", NativeID:"controllerType=0 controllerNumber=1 scan=25735"
(R)GALGAETSAQTTGSSATVGGGSDSKGESSAGGTANqGSNVAAESDSNqKIR(S)	1	94.82	25	0	2	Deamidated (+1), Deamidated (+1)	1179.55	4714.15	4	0.02368	5.022	1887.06		105692	281	331	0		JS_UASM_FFPE26.25959.25959.4 File:"JS_UASM_FFPE26.raw", NativeID:"controllerType=0 controllerNumber=1 scan=25959"
(R)GALGAETSAqTTGSSATVGGGSDSKGESSAGGTAnQGSNVAAESDSNqKIR(S)	1	84.07	25	4.42	2	Deamidated (+1), Deamidated (+1), Deamidated (+1)	1179.79	4715.14	4	0.01964	4.165	1914.81		79094.6	281	331	0		JS_UASM_FFPE26.26645.26645.4 File:"JS_UASM_FFPE26.raw", NativeID:"controllerType=0 controllerNumber=1 scan=26645"
(K)GESSAGGTANQGSNVAAESDSNQKIR(S)	1	35.75	25	35.55	2		845.726	2534.16	3	-0.001878	-0.7408	1272.63		60421.7	306	331	0		JS_UASM_FFPE23.12799.12799.3 File:"JS_UASM_FFPE23.raw", NativeID:"controllerType=0 controllerNumber=1 scan=12799"
(K)SGSAAALGAIKDK(L)	0.99	19.41	25	13.45	2		594.831	1187.65	2	-0.003734	-3.141	1205.5		110948	344	356	0		JS_UASM_FFPE23.11291.11291.2 File:"JS_UASM_FFPE23.raw", NativeID:"controllerType=0 controllerNumber=1 scan=11291"
(K)SGSAAALGAIKDK(L)	1	36.81	25	24.24	2		594.83	1187.65	2	-0.004834	-4.067	1239.45		157371	344	356	0		JS_UASM_FFPE23.12053.12053.2 File:"JS_UASM_FFPE23.raw", NativeID:"controllerType=0 controllerNumber=1 scan=12053"
(K)SGSAAALGAIKDK(L)	1	33.6	25	14.72	2		594.831	1187.65	2	-0.003368	-2.833	1272.33		175958	344	356	0		JS_UASM_FFPE23.12793.12793.2 File:"JS_UASM_FFPE23.raw", NativeID:"controllerType=0 controllerNumber=1 scan=12793"
(K)SGSAAALGAIKDKLVGKSDAASGGSAESVGSAK(T)	1	58.94	25	53.09	2		737.637	2946.52	4	-0.008054	-2.732	2308.51		372126	344	376	0		JS_UASM_FFPE23.38914.38914.4 File:"JS_UASM_FFPE23.raw", NativeID:"controllerType=0 controllerNumber=1 scan=38914"
(K)SGSAAALGAIKDKLVGK(S)	1	45.96	25	45.96	2		793.467	1584.92	2	-0.001616	-1.019	2309.71		286585	344	360	0		JS_UASM_FFPE23.38946.38946.2 File:"JS_UASM_FFPE23.raw", NativeID:"controllerType=0 controllerNumber=1 scan=38946"
(K)SGSAAALGAIKDKLVGKSDAASGGSAESVGSAK(T)	1	68.02	25	67.75	2		983.182	2946.52	3	-0.001511	-0.5126	2313.97		151310	344	376	0		JS_UASM_FFPE23.39055.39055.3 File:"JS_UASM_FFPE23.raw", NativeID:"controllerType=0 controllerNumber=1 scan=39055"
(K)SGSAAALGAIKDKLVGK(S)	0.97	20.15	25	17.11	2		529.312	1584.91	3	-0.005413	-3.413	2321.45		1319690	344	360	0		JS_UASM_FFPE23.39241.39241.3 File:"JS_UASM_FFPE23.raw", NativeID:"controllerType=0 controllerNumber=1 scan=39241"
(K)SGSAAALGAIKDKLVGKSDAASGGSAESVGSAK(T)	1	65.65	25	63.02	2		737.637	2946.52	4	-0.006834	-2.319	2343.22		837973	344	376	0		JS_UASM_FFPE23.39793.39793.4 File:"JS_UASM_FFPE23.raw", NativeID:"controllerType=0 controllerNumber=1 scan=39793"
(K)SGSAAALGAIKDKLVGKSDAASGGSAESVGSAK(T)	1	59.72	25	59.72	2		983.181	2946.52	3	-0.006272	-2.128	2349.08		202427	344	376	0		JS_UASM_FFPE23.39944.39944.3 File:"JS_UASM_FFPE23.raw", NativeID:"controllerType=0 controllerNumber=1 scan=39944"
(K)SGSAAALGAIKDKLVGKSDAASGGSAESVGSAK(T)	1	53.74	25	45.52	2		737.638	2946.52	4	-0.00537	-1.822	2379.75		526264	344	376	0		JS_UASM_FFPE23.40725.40725.4 File:"JS_UASM_FFPE23.raw", NativeID:"controllerType=0 controllerNumber=1 scan=40725"
(K)SGSAAALGAIKDKLVGKSDAASGGSAESVGSAK(T)	1	66.84	25	60.7	2		983.182	2946.52	3	-0.001694	-0.5747	2388.4		122960	344	376	0		JS_UASM_FFPE23.40946.40946.3 File:"JS_UASM_FFPE23.raw", NativeID:"controllerType=0 controllerNumber=1 scan=40946"
(K)SGSAAALGAIKDK(L)	1	34.68	25	24.24	2		594.831	1187.65	2	-0.003978	-3.347	1228.81		130897	344	356	0		JS_UASM_FFPE26.10878.10878.2 File:"JS_UASM_FFPE26.raw", NativeID:"controllerType=0 controllerNumber=1 scan=10878"
(K)SGSAAALGAIKDK(L)	1	31.13	25	19.29	2		594.832	1187.65	2	-0.002636	-2.218	1261.54		148863	344	356	0		JS_UASM_FFPE26.11609.11609.2 File:"JS_UASM_FFPE26.raw", NativeID:"controllerType=0 controllerNumber=1 scan=11609"
(K)SGSAAALGAIKDKLVGK(S)	0.99	21.87	25	21.87	2		529.312	1584.92	3	-0.004498	-2.836	2308.48		344632	344	360	0		JS_UASM_FFPE26.36159.36159.3 File:"JS_UASM_FFPE26.raw", NativeID:"controllerType=0 controllerNumber=1 scan=36159"
(K)SGSAAALGAIKDKLVGKSDAASGGSAESVGSAK(T)	1	52.71	25	47.82	2		983.182	2946.52	3	-0.003158	-1.071	2327.5		102657	344	376	0		JS_UASM_FFPE26.36601.36601.3 File:"JS_UASM_FFPE26.raw", NativeID:"controllerType=0 controllerNumber=1 scan=36601"
(K)SGSAAALGAIKDKLVGKSDAASGGSAESVGSAK(T)	1	52.53	25	43.52	2		737.636	2946.52	4	-0.009518	-3.229	2339.43		441624	344	376	0		JS_UASM_FFPE26.36892.36892.4 File:"JS_UASM_FFPE26.raw", NativeID:"controllerType=0 controllerNumber=1 scan=36892"
(K)SGSAAALGAIKDKLVGK(S)	0.99	23.1	25	19.44	2		529.312	1584.92	3	-0.005047	-3.182	2341.85		766573	344	360	0		JS_UASM_FFPE26.36951.36951.3 File:"JS_UASM_FFPE26.raw", NativeID:"controllerType=0 controllerNumber=1 scan=36951"
(K)SGSAAALGAIKDKLVGKSDAASGGSAESVGSAK(T)	1	84.36	25	84.36	2		983.18	2946.52	3	-0.008834	-2.997	2363.3		128054	344	376	0		JS_UASM_FFPE26.37470.37470.3 File:"JS_UASM_FFPE26.raw", NativeID:"controllerType=0 controllerNumber=1 scan=37470"
(K)SGSAAALGAIKDKLVGKSDAASGGSAESVGSAK(T)	1	55.51	25	45.86	2		737.638	2946.52	4	-0.004394	-1.491	2374.88		366915	344	376	0		JS_UASM_FFPE26.37754.37754.4 File:"JS_UASM_FFPE26.raw", NativeID:"controllerType=0 controllerNumber=1 scan=37754"
(K)SGSAAALGAIKDKLVGK(S)	0.97	19.97	25	19.97	2		529.312	1584.92	3	-0.005047	-3.182	2377.31		406525	344	360	0		JS_UASM_FFPE26.37811.37811.3 File:"JS_UASM_FFPE26.raw", NativeID:"controllerType=0 controllerNumber=1 scan=37811"
(K)SGSAAALGAIKDKLVGKSDAASGGSAESVGSAK(T)	1	29.46	25	26.39	2		983.183	2946.53	3	0.002518	0.8543	2409.58		86694.6	344	376	0		JS_UASM_FFPE26.38590.38590.3 File:"JS_UASM_FFPE26.raw", NativeID:"controllerType=0 controllerNumber=1 scan=38590"
(K)LVGKSDAASGGSAESVGSAK(T)	1	45.71	25	45.64	2		593.301	1776.88	3	-0.003488	-1.962	1047.47		62757.7	357	376	0		JS_UASM_FFPE23.7826.7826.3 File:"JS_UASM_FFPE23.raw", NativeID:"controllerType=0 controllerNumber=1 scan=7826"
(K)LVGKSDAASGGSAESVGSAK(T)	0.99	25.71	25	22.92	2		593.3	1776.88	3	-0.006968	-3.919	1056.06		70402	357	376	0		JS_UASM_FFPE26.7101.7101.3 File:"JS_UASM_FFPE26.raw", NativeID:"controllerType=0 controllerNumber=1 scan=7101"
(K)TDFNTGGSAGHSAGEGSGFAETSVGGQTR(Q)	0.99	26.52	25	25.96	2		914.738	2741.19	3	0.001628	0.5937	1924.24		86062.5	377	405	0		JS_UASM_FFPE23.29213.29213.3 File:"JS_UASM_FFPE23.raw", NativeID:"controllerType=0 controllerNumber=1 scan=29213"
(K)TDFNTGGSAGHSAGEGSGFAETSVGGQTR(Q)	1	107.38	25	103.32	2		914.737	2741.19	3	-0.003682	-1.343	1956.67		298025	377	405	0		JS_UASM_FFPE23.30021.30021.3 File:"JS_UASM_FFPE23.raw", NativeID:"controllerType=0 controllerNumber=1 scan=30021"
(K)TDFNTGGSAGHSAGEGSGFAETSVGGQTR(Q)	1	135.45	25	131.91	2		1371.6	2741.19	2	0.00213	0.7768	1972.47		63152.4	377	405	0		JS_UASM_FFPE23.30413.30413.2 File:"JS_UASM_FFPE23.raw", NativeID:"controllerType=0 controllerNumber=1 scan=30413"
(K)TDFNTGGSAGHSAGEGSGFAETSVGGqTR(Q)	1	115.75	25	25.13	2	Deamidated (+1)	1372.1	2742.18	2	0.008592	3.132	1977.03		57397.1	377	405	0		JS_UASM_FFPE23.30525.30525.2 File:"JS_UASM_FFPE23.raw", NativeID:"controllerType=0 controllerNumber=1 scan=30525"
(K)TDFNTGGSAGHSAGEGSGFAETSVGGQTR(Q)	1	112.59	25	112.59	2		914.736	2741.19	3	-0.005146	-1.877	1989.43		803244	377	405	0		JS_UASM_FFPE23.30831.30831.3 File:"JS_UASM_FFPE23.raw", NativeID:"controllerType=0 controllerNumber=1 scan=30831"
(K)TDFNTGGSAGHSAGEGSGFAETSVGGQTR(Q)	1	137.19	25	137.17	2		1371.6	2741.19	2	-0.005438	-1.983	2005.2		77898.6	377	405	0		JS_UASM_FFPE23.31227.31227.2 File:"JS_UASM_FFPE23.raw", NativeID:"controllerType=0 controllerNumber=1 scan=31227"
(K)TDFNTGGSAGHSAGEGSGFAETSVGGQTR(Q)	1	95.98	25	91.9	2		914.736	2741.19	3	-0.004963	-1.81	2021.88		448669	377	405	0		JS_UASM_FFPE23.31648.31648.3 File:"JS_UASM_FFPE23.raw", NativeID:"controllerType=0 controllerNumber=1 scan=31648"
(K)TDFNTGGSAGHSAGEGSGFAETSVGGQTR(Q)	1	94.62	25	94.06	2		914.738	2741.19	3	-0.0002019	-0.07364	2056.36		297527	377	405	0		JS_UASM_FFPE23.32522.32522.3 File:"JS_UASM_FFPE23.raw", NativeID:"controllerType=0 controllerNumber=1 scan=32522"
(K)TDFnTGGSAGHSAGEGSGFAETSVGGqTR(Q)	1	102.52	25	98.83	2	Deamidated (+1), Deamidated (+1)	1372.6	2743.18	2	0.02238	8.155	2089.71		59468.6	377	405	0		JS_UASM_FFPE23.33368.33368.2 File:"JS_UASM_FFPE23.raw", NativeID:"controllerType=0 controllerNumber=1 scan=33368"
(K)TDFnTGGSAGHSAGEGSGFAETSVGGQTR(Q)	1	94.75	25	7.86	2	Deamidated (+1)	1372.1	2742.18	2	0.002	0.7291	2103.61		34604.6	377	405	0		JS_UASM_FFPE23.33725.33725.2 File:"JS_UASM_FFPE23.raw", NativeID:"controllerType=0 controllerNumber=1 scan=33725"
(K)TDFNTGGSAGHSAGEGSGFAETSVGGqTR(Q)	1	78.79	25	6.21	2	Deamidated (+1)	915.069	2742.18	3	0.009313	3.395	2139.03		267518	377	405	0		JS_UASM_FFPE23.34631.34631.3 File:"JS_UASM_FFPE23.raw", NativeID:"controllerType=0 controllerNumber=1 scan=34631"
(K)TDFNTGGSAGHSAGEGSGFAETSVGGQTR(Q)	1	38.12	25	34.78	2		914.736	2741.19	3	-0.00478	-1.743	2164.57		208677	377	405	0		JS_UASM_FFPE23.35285.35285.3 File:"JS_UASM_FFPE23.raw", NativeID:"controllerType=0 controllerNumber=1 scan=35285"
(K)TDFNTGGSAGHSAGEGSGFAETSVGGqTR(Q)	1	67.28	25	21.42	2	Deamidated (+1)	915.069	2742.19	3	0.01078	3.929	2172.29		189881	377	405	0		JS_UASM_FFPE23.35481.35481.3 File:"JS_UASM_FFPE23.raw", NativeID:"controllerType=0 controllerNumber=1 scan=35481"
(K)TDFnTGGSAGHSAGEGSGFAETSVGGqTR(Q)	1	41.02	25	33.25	2	Deamidated (+1), Deamidated (+1)	915.403	2743.19	3	0.02597	9.463	2198.3		154651	377	405	0		JS_UASM_FFPE23.36128.36128.3 File:"JS_UASM_FFPE23.raw", NativeID:"controllerType=0 controllerNumber=1 scan=36128"
(K)TDFNTGGSAGHSAGEGSGFAETSVGGqTR(Q)	1	34.35	25	5.38	2	Deamidated (+1)	915.066	2742.18	3	0.0003401	0.124	2218.6		134726	377	405	0		JS_UASM_FFPE23.36640.36640.3 File:"JS_UASM_FFPE23.raw", NativeID:"controllerType=0 controllerNumber=1 scan=36640"
(K)TDFnTGGSAGHSAGEGSGFAETSVGGQTR(Q)	1	34.7	25	5.06	2	Deamidated (+1)	915.067	2742.18	3	0.004186	1.526	2251.48		159023	377	405	0		JS_UASM_FFPE23.37466.37466.3 File:"JS_UASM_FFPE23.raw", NativeID:"controllerType=0 controllerNumber=1 scan=37466"
(K)TDFNTGGSAGHSAGEGSGFAETSVGGQTR(Q)	1	41.81	25	41.47	2		914.738	2741.19	3	0.001445	0.527	2265.53		147154	377	405	0		JS_UASM_FFPE23.37821.37821.3 File:"JS_UASM_FFPE23.raw", NativeID:"controllerType=0 controllerNumber=1 scan=37821"
(K)TDFnTGGSAGHSAGEGSGFAETSVGGqTR(Q)	1	35.65	25	34.72	2	Deamidated (+1), Deamidated (+1)	915.402	2743.18	3	0.02432	8.863	2271.34		154451	377	405	0		JS_UASM_FFPE23.37972.37972.3 File:"JS_UASM_FFPE23.raw", NativeID:"controllerType=0 controllerNumber=1 scan=37972"
(K)TDFNTGGSAGHSAGEGSGFAETSVGGqTR(Q)	0.99	26.5	25	11.32	2	Deamidated (+1)	915.069	2742.18	3	0.008398	3.061	2285.81		132005	377	405	0		JS_UASM_FFPE23.38340.38340.3 File:"JS_UASM_FFPE23.raw", NativeID:"controllerType=0 controllerNumber=1 scan=38340"
(K)TDFnTGGSAGHSAGEGSGFAETSVGGqTR(Q)	0.97	24.51	25	24.51	2	Deamidated (+1), Deamidated (+1)	915.403	2743.19	3	0.0267	9.73	1932.21		85511.1	377	405	0		JS_UASM_FFPE26.27084.27084.3 File:"JS_UASM_FFPE26.raw", NativeID:"controllerType=0 controllerNumber=1 scan=27084"
(K)TDFNTGGSAGHSAGEGSGFAETSVGGQTR(Q)	1	99.4	25	94.11	2		914.737	2741.19	3	-0.003133	-1.142	1945.28		117298	377	405	0		JS_UASM_FFPE26.27409.27409.3 File:"JS_UASM_FFPE26.raw", NativeID:"controllerType=0 controllerNumber=1 scan=27409"
(K)TDFNTGGSAGHSAGEGSGFAETSVGGQTR(Q)	1	81.48	25	77.03	2		914.736	2741.19	3	-0.005878	-2.144	1980.23		243967	377	405	0		JS_UASM_FFPE26.28253.28253.3 File:"JS_UASM_FFPE26.raw", NativeID:"controllerType=0 controllerNumber=1 scan=28253"
(K)TDFnTGGSAGHSAGEGSGFAETSVGGQTR(Q)	1	123.31	25	8	2	Deamidated (+1)	1372.1	2742.18	2	0.00664	2.421	1989.99		45439.6	377	405	0		JS_UASM_FFPE26.28487.28487.2 File:"JS_UASM_FFPE26.raw", NativeID:"controllerType=0 controllerNumber=1 scan=28487"
(K)TDFNTGGSAGHSAGEGSGFAETSVGGQTR(Q)	1	93.61	25	88.08	2		914.736	2741.19	3	-0.005878	-2.144	2013.16		206101	377	405	0		JS_UASM_FFPE26.29039.29039.3 File:"JS_UASM_FFPE26.raw", NativeID:"controllerType=0 controllerNumber=1 scan=29039"
(K)TDFNTGGSAGHSAGEGSGFAETSVGGQTR(Q)	1	83.37	25	80.95	2		914.732	2741.18	3	-0.01631	-5.95	2054.08		133200	377	405	0		JS_UASM_FFPE26.30010.30010.3 File:"JS_UASM_FFPE26.raw", NativeID:"controllerType=0 controllerNumber=1 scan=30010"
(K)TDFNTGGSAGHSAGEGSGFAETSVGGqTR(Q)	1	87.88	25	2.77	2	Deamidated (+1)	915.068	2742.18	3	0.00748	2.727	2096		212215	377	405	0		JS_UASM_FFPE26.31016.31016.3 File:"JS_UASM_FFPE26.raw", NativeID:"controllerType=0 controllerNumber=1 scan=31016"
(K)TDFNTGGSAGHSAGEGSGFAETSVGGqTR(Q)	1	70.41	25	15.31	2	Deamidated (+1)	915.068	2742.18	3	0.006199	2.26	2139.22		176659	377	405	0		JS_UASM_FFPE26.32052.32052.3 File:"JS_UASM_FFPE26.raw", NativeID:"controllerType=0 controllerNumber=1 scan=32052"
(K)TDFnTGGSAGHSAGEGSGFAETSVGGqTR(Q)	1	46.84	25	45.04	2	Deamidated (+1), Deamidated (+1)	915.402	2743.18	3	0.02524	9.196	2159.39		145265	377	405	0		JS_UASM_FFPE26.32533.32533.3 File:"JS_UASM_FFPE26.raw", NativeID:"controllerType=0 controllerNumber=1 scan=32533"
(K)TDFNTGGSAGHSAGEGSGFAETSVGGQTR(Q)	1	50.24	25	44.6	2		914.737	2741.19	3	-0.002398	-0.8745	2162.53		138246	377	405	0		JS_UASM_FFPE26.32610.32610.3 File:"JS_UASM_FFPE26.raw", NativeID:"controllerType=0 controllerNumber=1 scan=32610"
(K)TDFNTGGSAGHSAGEGSGFAETSVGGqTR(Q)	1	35.6	25	4.52	2	Deamidated (+1)	915.071	2742.19	3	0.01517	5.531	2172.88		131741	377	405	0		JS_UASM_FFPE26.32866.32866.3 File:"JS_UASM_FFPE26.raw", NativeID:"controllerType=0 controllerNumber=1 scan=32866"
(K)TDFNTGGSAGHSAGEGSGFAETSVGGqTR(Q)	1	30.99	25	1.9	2	Deamidated (+1)	915.066	2742.18	3	-2.594e-05	-0.009457	2210.65		99250.2	377	405	0		JS_UASM_FFPE26.33785.33785.3 File:"JS_UASM_FFPE26.raw", NativeID:"controllerType=0 controllerNumber=1 scan=33785"
(R)QTGAVEGSQTSSASGSVTLK(R)	1	59	25	57.19	2		947.971	1893.93	2	-0.001582	-0.8348	1477.44		51757.8	406	425	0		JS_UASM_FFPE23.17832.17832.2 File:"JS_UASM_FFPE23.raw", NativeID:"controllerType=0 controllerNumber=1 scan=17832"
(R)QTGAVEGSQTSSASGSVTLK(R)	1	113.75	25	113.75	2		947.971	1893.93	2	-0.0009719	-0.5129	1511.18		110537	406	425	0		JS_UASM_FFPE23.18658.18658.2 File:"JS_UASM_FFPE23.raw", NativeID:"controllerType=0 controllerNumber=1 scan=18658"
(R)QTGAVEGSQTSSASGSVTLK(R)	1	128.26	25	128.26	2		947.972	1893.93	2	0.001348	0.7114	1544.03		81261	406	425	0		JS_UASM_FFPE23.19476.19476.2 File:"JS_UASM_FFPE23.raw", NativeID:"controllerType=0 controllerNumber=1 scan=19476"
(R)QTGAVEGSqTSSASGSVTLK(R)	1	72.85	25	18.41	2	Deamidated (+1)	948.471	1894.93	2	0.01428	7.532	1567.54		61586.7	406	425	0		JS_UASM_FFPE23.20075.20075.2 File:"JS_UASM_FFPE23.raw", NativeID:"controllerType=0 controllerNumber=1 scan=20075"
(R)qTGAVEGSQTSSASGSVTLK(R)	1	115.51	25	3.45	2	Deamidated (+1)	948.471	1894.93	2	0.01513	7.982	1492.54		51217.9	406	425	0		JS_UASM_FFPE26.16942.16942.2 File:"JS_UASM_FFPE26.raw", NativeID:"controllerType=0 controllerNumber=1 scan=16942"
(R)QTGAVEGSQTSSASGSVTLK(R)	1	105.15	25	105.15	2		947.969	1893.92	2	-0.005488	-2.896	1496.57		61381.4	406	425	0		JS_UASM_FFPE26.17037.17037.2 File:"JS_UASM_FFPE26.raw", NativeID:"controllerType=0 controllerNumber=1 scan=17037"
(R)QTGAVEGSQTSSASGSVTLK(R)	1	116.09	25	116.09	2		947.968	1893.92	2	-0.005854	-3.089	1530.79		68525.9	406	425	0		JS_UASM_FFPE26.17845.17845.2 File:"JS_UASM_FFPE26.raw", NativeID:"controllerType=0 controllerNumber=1 scan=17845"
