# Supplementary material for: Distribution of Select Cement Proteins in the Acorn Barnacle Amphibalanus amphitrite
Source: Frontiers journal article supplement (doi:10.3389/fmars.2020.586281), 2020-10-06
Supplement: Table_1.docx [file Table_1.docx]

**Supplemental Table S1.** AaCP19-1 and AaCP43-1 peptide sequences submitted for targeted fragmentation.

| **Peptide** | **Calculated Precursor MW (Da)** | **Sequence** |
| --- | --- | --- |
| AaCP19-1_A | 2356.1442 | K.GGAAVSTTGSSGGTGTVHCVVVGPNK.I + Carbamidomethyl (C) |
| AaCP19-1_B | 1799.9378 | K.AAVGNTGVTGAGATAGDGILK.N |
| AaCP19-1_C | 2064.0124 | K.AGTGGTATIFQVADANGGVTEK.S |
| AaCP19-1_D | 1130.5819 | K.VVNEAETELK.L |
| AaCP19-1_E | 1928.0327 | K.KAAVGNTGVTGAGATAGDGILK.N |
| AaCP19-1_F | 1871.004 | K.SIKVDHLLTDDFEVIK.I |
| AaCP19-1_G | 1542.793 | K.VDHLLTDDFEVIK.I |
| AaCP19-1_H | 931.4975 | K.GSGVGDSLLK.V |
| AaCP19-1_I | 987.5713 | K.SKVGQAAVTK.G |
| AaCP19-1_J | 1928.0327 | K.KAAVGNTGVTGAGATAGDGILK.N |
| AaCP19-1_K | 1085.6445 | K.NLVKGVTEVK.T |
| AaCP19-1_L | 2255.2121 | K.AAVGNTGVTGAGATAGDGILKNLVK.G + Deamidated (NQ) |
| AaCP19-1_M | 1444.727 | K.EKKQGTATSSSGHK.G |
| AaCP19-1_N | 1685.906 | K.IKEKKQGTATSSSGHK.G |
| AaCP19-1_O | 1187.5895 | K.KQGTATSSSGHK.G |
| AaCP19-1_P | 2369.3206 | K.SIKVDHLLTDDFEVIKIKEK.K |
| AaCP43-1_A | 1487.7944 | K.RAATDADAVTVGTLK.T |
| AaCP43-1_B | 1620.7591 | K.SSGGAVSLEQTADQGSK.A |
| AaCP43-1_C | 3316.4485 | K.GASVTGQQTSGASVGEATSTSDATGEAGTICDDTK.S + Carbamidomethyl (C) |
| AaCP43-1_D | 1508.6955 | K.SDVQGGASTSTISDGK.A |
| AaCP43-1_E | 2734.3257 | K.AASEALNTAASETLTVPGGSSTVSNANSK.T |
| AaCP43-1_F | 2196.0142 | R.GALGAETSAQTTGSSATVGGGSDSK.G |
| AaCP43-1_G | 2264.9741 | K.GESSAGGTANQGSNVAAESDSNQK.I |
| AaCP43-1_H | 2741.1914 | K.TDFNTGGSAGHSAGEGSGFAETSVGGQTR.Q |
| AaCP43-1_I | 2480.2103 | R.KRGALGAETSAQTTGSSATVGGGSDSK.G |
| AaCP43-1_J | 3270.6779 | R.QTGAVEGSQTSSASGSVTLKRPVWPCRLPSK.A + Carbamidomethyl (C) |
| AaCP43-1_K | 919.4698 | K.WGAKCTVR.W |
| AaCP43-1_L | 1261.6502 | K.WGAKCTVRWR.D |
| AaCP43-1_M | 2340.1743 | R.AGATEGSAASTSATKVKCKPGFSK.G + Carbamidomethyl (C) |
| AaCP43-1_N | 1197.6102 | R.NPRDNAELLR.I + Deamidated (NQ) |
